# Supplementary material for: Integrative Genome-Scale Analysis Identifies Epigenetic Mechanisms of Transcriptional Deregulation in Unfavorable Neuroblastomas
Source: Oxford University Press journal article supplement (doi:10.1158/0008-5472.can-15-2507), 2016-09-07
Supplement: 00085472can152507-sup-155373_1_data_0_c6mbqc.xlsx [file 00085472can152507-sup-155373_1_data_0_c6mbqc.xlsx]

## Sheet: Be(2)-C_HyperDownHR
Gene symbol	K27me3 lost (134)	expression induced (81)	DNA methylation lost (66)
ABCB1	0	0	0
ABR	1	0	1
ACHE	1	0	0
ADCY1	0	1	0
ADRB2	0	0	0
AGT	0	0	0
AHNAK	1	1	0
ALCAM	0	0	1
ALS2CL	0	0	0
AMIGO2	1	0	0
ANKRD35	1	0	0
ANKS1A	0	1	0
ANO6	1	0	0
ANXA2	1	0	0
AQP1	0	0	1
ARHGDIB	0	0	0
ARHGEF10L	0	1	0
ARHGEF3	0	1	0
ASB2	0	0	0
ATP1B1	0	0	0
ATP2B4	0	1	0
B2M	0	0	0
BCAT1	0	0	1
BCL2	0	1	0
BOK	1	1	0
BST2	0	1	0
BTBD3	1	1	0
BZRAP1	0	0	0
C10orf10	0	0	0
C11orf21	0	0	0
c1orf173	0	0	0
C1R	0	0	0
CACNA1G	1	0	1
CACNA2D3	0	0	1
CAMTA1	0	0	0
CAPG	0	0	0
CCDC24	0	0	0
CCDC68	0	0	0
CCND1	0	0	1
CCR7	0	0	0
CD247	1	0	0
CD27	0	0	0
CD3D	1	0	0
CD44	1	1	0
CD52	0	0	0
CD74	0	0	0
CD9	0	0	0
CDC42	0	0	0
CDH22	1	0	0
CDKN2D	0	0	0
CELF4	0	0	1
CHD5	1	0	0
CHGB	0	1	0
CLDN5	0	0	0
CLEC3B	1	0	0
CNKSR3	0	0	0
CNR1	1	0	0
CNTN1	1	0	0
CNTNAP2	1	0	1
COG5	0	0	0
COL18A1	1	0	0
COL1A1	1	0	0
COL9A2	1	1	0
CORO1A	0	0	0
CPLX3	0	0	0
CPNE8	0	1	0
CREB5	1	1	0
CRIP2	0	0	0
CSGALNACT1	1	0	0
CTNNBIP1	0	0	0
CXXC5	0	0	0
CYB561	0	0	0
CYB5R2	1	0	0
DBH	0	0	0
DDC	0	0	0
DENND2D	1	0	0
DGKB	1	1	0
DKK3	0	0	0
DLC1	0	0	1
DLEU7	0	0	1
DLG2	1	1	0
DNAJA4	0	1	0
DNER	1	0	0
DOCK10	1	0	0
DOCK4	0	0	1
DPP6	1	1	1
DPYSL3	0	0	1
DUSP23	0	0	0
DUSP6	1	1	0
EBF1	0	0	1
ECHDC3	0	0	0
EFNB2	1	0	1
EGLN3	0	0	0
ENOSF1	1	0	0
ENOX1	0	0	1
ENTPD3	0	1	0
EPAS1	1	1	0
EPB41L1	1	0	0
EPB41L3	0	0	0
EPB41L4A	1	0	0
EPHA5	1	0	0
EPHB3	1	1	0
EPS8L1	1	0	0
EXOC4	0	0	1
FAM102B	1	1	0
FAM134B	1	1	0
FAM167A	0	0	0
FBLN5	0	0	0
FDCSP	0	0	0
FLRT3	1	0	1
FNDC5	0	1	0
FOXO1	1	0	0
FRZB	0	0	0
GATA3	1	0	0
GBP5	0	0	0
GDPD5	1	0	0
GEM	1	0	0
GFRA2	1	0	0
GFRA3	1	0	0
GIMAP8	0	0	0
GNG2	0	1	0
GPR123	0	0	0
GPR158	0	0	0
GPR22	0	1	0
GRID2	1	0	0
HAND1	0	0	0
HENMT1	0	0	0
HEYL	0	0	0
HIST1H1A	0	0	0
HLA-DOA	1	0	1
HLA-F	1	0	0
HOXB2	0	0	0
HOXC9	0	0	0
HS3ST5	0	0	0
HS6ST3	1	0	0
HSPA12A	0	0	0
HTR4	1	0	0
HYI	1	0	0
ICA1	0	1	1
ICAM2	1	0	0
IGSF21	1	0	0
IL2RB	0	0	0
IL4R	0	0	0
IL7	0	1	0
INPP5D	0	0	0
ITGB8	0	0	0
ITM2C	1	0	0
KCNH8	1	0	0
KCNK10	1	0	1
KCNMA1	1	1	0
KCTD16	1	1	1
KIAA0513	0	1	0
KIF1B	0	0	1
KIF26B	1	0	0
KLF11	0	0	0
KLHDC8A	1	1	0
KLHL6	0	0	0
KNDC1	0	0	1
KRT19	0	1	1
LAMA4	0	1	0
LCK	0	0	0
LCP1	0	1	1
LGALS2	0	0	0
LHFPL2	0	0	0
LIFR	0	0	0
LINGO1	1	0	0
LMO1	1	0	0
LRFN2	0	0	0
LRRC55	0	0	0
LRRN3	0	0	1
LRRTM4	0	0	0
LSP1	0	0	0
LTB	0	0	0
MAP7	0	0	1
MAPT	0	1	1
MATN2	0	1	0
MDGA1	0	1	1
ME1	0	0	0
MEIS1	1	0	1
MEIS2	0	0	0
MEST	1	0	1
MFI2	1	1	0
MGAT4C	0	0	1
MXRA7	0	0	0
MYLK	0	1	0
MYO15A	0	0	0
MYO16	1	0	0
MYO7A	0	0	0
NCKAP5	0	0	1
NEFH	1	0	0
NES	0	0	0
NGFR	1	1	0
NNAT	0	1	0
NPFF	0	0	0
NR4A1	1	0	0
NRCAM	0	0	1
NRP2	1	1	0
NTRK1	0	1	0
NXPH1	1	0	0
OSBPL3	0	0	1
PAG1	0	0	0
PAPLN	1	0	0
PARVA	0	1	0
PCDH7	1	0	1
PCDH9	0	0	1
PCDHB15	0	1	1
PCDHB5	0	0	0
PCDHB7	0	1	0
PCSK1	1	0	0
PGM2L1	0	1	1
PIK3CD	1	0	0
PIWIL2	0	0	0
PLAT	0	1	0
PLCD4	0	1	0
PLXNA4	0	1	1
PLXNC1	1	0	0
PMEL	0	0	1
PMP22	0	0	0
POMC	1	0	0
PPAPDC1A	1	0	0
PPP1R3B	0	0	0
PRDM2	0	0	0
PRKCB	0	0	0
PRKCZ	0	0	1
PRPH	0	1	0
PRPH2	0	0	0
PRRT2	0	0	0
PRUNE2	0	0	1
PTGDS	0	0	0
PTGER4	1	0	0
PTN	0	0	0
PTPRC	0	0	0
PTPRF	1	0	1
PVRL1	0	0	0
QPCT	0	1	0
RAB32	1	0	0
RAB3B	0	1	0
RAB3C	1	0	0
RAMP1	0	0	0
RAMP3	1	0	0
RAP1GAP2	0	0	0
RAPGEF4	1	1	0
RARRES2	1	0	0
RARRES3	0	0	0
RASD1	1	0	0
RBP1	1	1	0
RFTN1	0	1	1
RGMB	1	0	0
RGS10	1	0	0
RGS5	1	0	0
RGS7	1	0	0
RGS9	1	0	0
RHBDL3	1	0	0
RHOH	0	0	0
RHOU	0	0	0
RIMS3	0	0	0
ROBO3	1	0	0
RYR2	1	0	1
S1PR4	1	0	0
SAMD11	0	1	0
SCG2	0	1	0
SCML4	1	0	0
SCN9A	0	0	1
SCPEP1	1	0	0
SDK1	1	0	0
SEMA3E	0	1	1
SEMA3G	0	0	0
SEPP1	1	0	0
SERPINA5	0	0	0
SERPINE2	1	1	0
SEZ6	0	0	0
SEZ6L	1	1	0
SFRP1	0	1	1
SHC1	0	1	0
SIGIRR	0	0	0
SLAMF8	0	0	0
SLC18A1	1	0	0
SLC18A2	1	1	0
SLC26A11	0	0	0
SLC8A1	0	0	1
SLCO3A1	1	0	1
SNTG2	1	0	1
SOBP	1	0	1
SORBS2	1	0	1
SORL1	1	1	0
SPEG	0	1	1
SPOCK1	1	1	0
SPOCK2	1	1	0
SPTB	1	0	1
SRGAP1	0	0	0
SRGAP3	0	1	1
SRGN	0	0	0
ST6GALNAC5	1	0	0
STAB1	0	0	1
STAC	0	0	0
SV2B	1	0	0
SYBU	1	1	0
SYN3	0	0	0
SYT4	0	0	0
TAGLN2	1	1	0
TFAP2B	1	0	1
TG	1	0	1
TGFBR2	1	0	0
TH	0	1	0
TIAM2	0	0	1
TLN2	1	1	0
TMC8	0	0	0
TMEFF2	1	1	1
TMEM107	0	0	0
TMTC2	1	0	1
TNF	0	0	0
TOX2	0	0	0
TRIM2	1	0	0
TRIM36	1	1	0
TRPV2	0	0	0
TUBA1C	0	0	0
TXNIP	0	1	0
VAMP8	0	0	0
VAT1L	0	0	0
VCAM1	1	0	0
VSTM2A	0	0	0
VSTM2L	1	1	0
VWDE	0	1	0
WDFY4	1	0	0
WNT4	1	0	0
XKR4	1	0	0
ZAP70	0	0	0
ZFHX4	0	0	0
ZFP36L2	0	0	0
ZFPM2	1	0	1

## Sheet: Be(2)-C_Global
Gene symbol	K27me3 lost (4817)	expression induced (1018)	DNA methylation lost (1695)
A1BG	0	0	0
A1CF	1	0	0
A2M	0	0	0
A2ML1	0	0	0
A4GALT	0	0	0
A4GNT	0	0	0
AAAS	0	0	0
AACS	0	0	1
AADAC	1	0	0
AADACL2	1	0	0
AADACL4	0	0	0
AADAT	1	0	0
AAGAB	1	0	0
AAK1	0	0	0
AAMP	0	0	1
AANAT	0	0	0
AARS	0	0	0
AARS2	0	0	0
AASDHPPT	0	0	0
AASS	1	1	0
AATF	0	0	0
AATK	0	0	0
ABAT	0	1	0
ABCA1	1	1	1
ABCA10	1	0	0
ABCA12	0	0	1
ABCA13	0	0	0
ABCA2	0	0	0
ABCA3	0	0	1
ABCA4	0	0	0
ABCA5	1	1	0
ABCA6	0	0	0
ABCA7	0	0	0
ABCA8	1	0	0
ABCA9	1	0	0
ABCB10	0	0	0
ABCB11	1	0	0
ABCB4	1	0	0
ABCB5	1	0	0
ABCB6	0	0	0
ABCB8	0	0	0
ABCB9	0	0	0
ABCC1	0	0	1
ABCC10	1	0	0
ABCC11	0	0	0
ABCC12	0	0	0
ABCC2	0	0	0
ABCC3	1	0	0
ABCC4	0	0	0
ABCC5	0	0	1
ABCC6	0	1	0
ABCC8	0	0	0
ABCC9	0	0	0
ABCD2	0	0	0
ABCD3	0	0	0
ABCD4	0	1	0
ABCE1	0	0	0
ABCF1	0	0	1
ABCF2	0	0	0
ABCF3	0	0	0
ABCG1	0	1	0
ABCG2	1	0	0
ABCG4	1	0	0
ABCG5	1	0	0
ABCG8	1	0	0
ABHD1	0	0	0
ABHD10	1	0	1
ABHD12	0	0	0
ABHD12B	1	0	0
ABHD13	0	0	0
ABHD14A	0	0	0
ABHD14B	0	0	0
ABHD15	1	0	0
ABHD16A	0	0	0
ABHD16B	0	0	1
ABHD2	0	0	1
ABHD3	0	0	0
ABHD4	1	1	0
ABHD5	0	0	0
ABHD6	0	0	0
ABHD8	0	0	1
ABI1	1	0	0
ABI2	0	0	1
ABI3	1	0	0
ABI3BP	0	0	0
ABL1	0	0	0
ABL2	0	0	1
ABLIM1	0	0	1
ABLIM2	1	1	1
ABLIM3	1	0	0
ABRA	1	0	0
ABT1	1	0	0
ABTB1	0	0	0
ABTB2	0	0	0
ACAA2	0	0	0
ACACA	0	0	1
ACACB	0	0	1
ACAD10	0	1	0
ACAD11	0	0	1
ACAD8	0	0	0
ACAD9	0	0	0
ACADL	1	0	0
ACADM	1	0	0
ACADS	0	0	0
ACADSB	0	0	0
ACADVL	0	1	0
ACAN	0	0	0
ACAP1	0	0	0
ACAP2	0	0	0
ACAP3	0	0	0
ACAT1	0	0	1
ACAT2	0	0	0
ACBD3	0	0	0
ACBD4	0	0	0
ACBD5	1	0	0
ACBD6	0	0	0
ACBD7	0	1	0
ACCS	0	0	0
ACCSL	0	0	0
ACD	0	0	0
ACE	0	0	0
ACER1	0	0	0
ACER2	0	0	0
ACER3	0	0	0
ACIN1	0	0	0
ACLY	0	0	0
ACMSD	0	0	0
ACO1	1	0	0
ACO2	0	0	0
ACOT1	0	0	0
ACOT11	0	0	0
ACOT12	0	0	0
ACOT13	0	0	0
ACOT2	0	0	0
ACOT4	1	0	0
ACOT6	0	0	0
ACOT7	0	0	0
ACOT8	0	0	0
ACOX1	0	0	0
ACOX2	0	0	0
ACOX3	0	0	0
ACOXL	1	0	1
ACP1	0	0	0
ACP2	0	0	0
ACP5	0	0	0
ACP6	1	1	0
ACPP	0	0	0
ACPT	0	0	0
ACR	0	0	0
ACRBP	0	0	0
ACRV1	0	0	1
ACSBG1	0	0	0
ACSBG2	0	0	0
ACSF2	0	1	0
ACSF3	0	0	1
ACSL1	0	0	0
ACSL3	0	0	1
ACSL5	1	0	0
ACSL6	1	1	0
ACSM1	0	0	0
ACSM2A	0	0	0
ACSM3	0	0	0
ACSM4	1	0	0
ACSM5	0	0	0
ACSS1	0	0	0
ACSS2	0	0	0
ACSS3	0	0	0
ACTA1	0	0	0
ACTA2	1	0	0
ACTB	0	0	0
ACTBL2	0	0	0
ACTC1	0	0	1
ACTG1	0	0	0
ACTG2	0	0	0
ACTL10	0	0	0
ACTL6A	0	0	0
ACTL6B	0	0	0
ACTL7A	0	0	0
ACTL7B	1	0	0
ACTL8	0	0	0
ACTL9	0	0	0
ACTN1	0	0	1
ACTN2	1	0	0
ACTN4	0	0	0
ACTR10	1	0	0
ACTR1A	0	0	0
ACTR1B	0	0	0
ACTR2	0	0	0
ACTR3	1	0	0
ACTR3B	1	0	0
ACTR3C	0	0	0
ACTR5	0	0	0
ACTR8	0	0	0
ACTRT2	0	0	0
ACVR1	0	0	0
ACVR1B	0	0	0
ACVR1C	1	0	1
ACVR2A	1	0	0
ACVR2B	0	0	0
ACVRL1	0	1	0
ACY1	0	0	0
ACY3	1	0	0
ACYP1	0	0	0
ACYP2	0	0	0
ADA	1	0	0
ADAD1	0	0	1
ADAD2	0	0	0
ADAL	0	0	0
ADAM10	0	0	0
ADAM11	1	0	0
ADAM12	0	0	0
ADAM15	0	0	0
ADAM17	0	0	1
ADAM18	1	0	0
ADAM19	1	0	0
ADAM2	0	0	0
ADAM20	0	0	0
ADAM21	0	0	0
ADAM22	0	0	0
ADAM23	1	0	0
ADAM28	1	0	1
ADAM29	1	0	0
ADAM30	1	0	0
ADAM32	0	1	1
ADAM33	0	0	0
ADAM7	1	0	0
ADAM8	1	0	0
ADAMDEC1	1	0	0
ADAMTS1	0	0	0
ADAMTS10	0	0	0
ADAMTS12	0	0	0
ADAMTS13	0	0	0
ADAMTS14	1	0	0
ADAMTS15	1	0	0
ADAMTS16	1	0	0
ADAMTS17	0	0	1
ADAMTS18	0	0	0
ADAMTS19	0	0	0
ADAMTS2	1	1	1
ADAMTS20	1	0	0
ADAMTS3	1	0	0
ADAMTS5	1	1	0
ADAMTS6	1	0	1
ADAMTS7	0	1	0
ADAMTS8	0	0	0
ADAMTS9	0	0	0
ADAMTSL1	0	0	0
ADAMTSL2	0	1	0
ADAMTSL3	1	0	0
ADAMTSL4	1	0	0
ADAMTSL5	1	0	0
ADAP1	1	0	0
ADAP2	0	0	0
ADAR	1	0	1
ADARB1	0	0	0
ADARB2	0	0	1
ADAT1	0	0	0
ADAT2	0	0	0
ADAT3	0	0	0
ADCK1	0	0	0
ADCK2	0	0	0
ADCK3	0	0	0
ADCK4	0	0	0
ADCK5	0	0	0
ADCY10	0	0	0
ADCY2	0	0	0
ADCY3	0	0	1
ADCY4	1	0	0
ADCY5	1	1	0
ADCY6	0	1	0
ADCY7	0	0	0
ADCY8	1	0	0
ADCY9	0	0	1
ADCYAP1	0	1	1
ADCYAP1R1	1	1	0
ADD1	0	0	1
ADD2	0	0	1
ADD3	0	0	1
ADGB	1	0	0
ADH1A	0	0	0
ADH1B	0	0	0
ADH4	0	0	0
ADH5	1	0	0
ADH6	0	0	0
ADH7	1	0	0
ADHFE1	1	0	0
ADI1	0	0	0
ADIG	0	0	0
ADIPOQ	1	0	0
ADIPOR2	0	0	0
ADK	0	0	1
ADM	1	1	0
ADM2	0	0	0
ADNP	0	0	0
ADNP2	0	0	0
ADO	1	0	0
ADORA1	1	0	0
ADORA2A	0	0	0
ADORA2B	0	0	0
ADORA3	1	0	0
ADPGK	1	0	0
ADPRH	0	0	0
ADPRHL1	0	0	0
ADPRHL2	0	0	0
ADRA1A	1	0	0
ADRA1B	1	0	0
ADRA1D	0	0	0
ADRA2A	1	0	0
ADRA2B	0	0	0
ADRA2C	0	0	0
ADRB1	1	0	0
ADRB3	0	0	0
ADRBK1	0	0	0
ADRBK2	0	0	0
ADRM1	0	0	0
ADSL	0	0	0
ADSS	0	0	0
ADSSL1	0	0	0
ADTRP	1	0	0
AEBP1	0	0	0
AEBP2	1	0	0
AEN	1	0	0
AES	0	0	0
AFAP1	0	0	0
AFAP1L1	1	1	0
AFAP1L2	1	0	0
AFF1	0	0	1
AFF3	1	0	1
AFF4	0	0	0
AFG3L2	0	0	0
AFM	1	0	0
AFMID	0	0	0
AFP	1	0	0
AFTPH	0	0	0
AGA	0	0	0
AGAP1	1	0	1
AGAP2	1	0	0
AGAP3	0	0	1
AGAP5	0	0	0
AGBL1	1	0	0
AGBL2	0	0	0
AGBL3	1	0	1
AGBL4	0	0	0
AGBL5	0	0	0
AGER	0	0	0
AGFG1	0	0	0
AGFG2	0	0	0
AGGF1	1	0	0
AGK	1	0	0
AGL	0	1	1
AGMAT	0	0	0
AGMO	1	0	0
AGPAT1	0	0	0
AGPAT2	0	0	0
AGPAT3	0	0	0
AGPAT4	0	1	0
AGPAT5	1	0	0
AGPS	0	0	0
AGR2	1	0	0
AGR3	1	0	0
AGRN	1	1	0
AGRP	0	0	0
AGTPBP1	1	0	0
AGTR1	1	0	1
AGTRAP	0	0	0
AGXT	0	0	0
AGXT2	1	0	0
AHCTF1	0	0	0
AHCY	0	0	0
AHCYL1	0	0	0
AHCYL2	1	1	1
AHDC1	0	0	1
AHI1	0	0	0
AHNAK2	0	1	0
AHR	1	0	0
AHRR	1	0	1
AHSA1	0	0	0
AHSA2	0	0	0
AHSG	1	0	0
AHSP	0	0	0
AICDA	0	0	0
AIDA	0	0	0
AIF1	0	0	0
AIF1L	1	0	0
AIFM2	0	0	1
AIFM3	1	0	0
AIG1	1	0	0
AIM1	1	0	0
AIM1L	0	0	0
AIM2	0	0	0
AIMP1	0	0	0
AIMP2	0	0	0
AIP	0	0	0
AIPL1	1	0	0
AIRE	0	0	0
AJAP1	0	0	1
AJUBA	1	0	0
AK1	0	0	0
AK2	0	0	0
AK3	1	1	0
AK4	1	1	0
AK5	0	0	1
AK7	0	0	0
AK8	0	0	0
AKAP1	1	0	0
AKAP10	0	0	0
AKAP11	1	0	1
AKAP12	0	1	0
AKAP13	0	0	1
AKAP2	1	0	0
AKAP3	1	0	0
AKAP5	0	0	0
AKAP6	1	1	1
AKAP7	0	0	0
AKAP8	0	0	0
AKAP8L	0	0	0
AKAP9	1	1	0
AKIP1	0	0	0
AKIRIN1	0	0	0
AKIRIN2	1	0	0
AKNA	0	0	0
AKR1A1	0	0	0
AKR1B1	0	0	0
AKR1B10	1	0	0
AKR1B15	0	0	0
AKR1C1	0	0	0
AKR1C2	0	0	0
AKR1C4	0	0	0
AKR1D1	0	0	0
AKR1E2	1	0	0
AKR7A2	0	0	0
AKR7A3	0	0	0
AKT1	0	0	0
AKT1S1	0	0	0
AKT2	0	0	0
AKT3	0	0	1
AKTIP	1	0	0
ALAD	0	0	0
ALAS1	0	0	0
ALB	1	0	0
ALDH16A1	0	0	0
ALDH18A1	0	0	0
ALDH1A1	0	0	0
ALDH1A2	0	0	0
ALDH1A3	0	1	1
ALDH1B1	1	0	0
ALDH1L1	1	1	0
ALDH1L2	0	0	0
ALDH2	0	0	0
ALDH3A1	0	0	0
ALDH3A2	1	0	0
ALDH3B1	0	0	0
ALDH3B2	1	0	0
ALDH4A1	0	0	0
ALDH5A1	0	0	0
ALDH6A1	0	1	0
ALDH7A1	0	0	0
ALDH8A1	0	0	0
ALDH9A1	1	0	0
ALDOA	0	0	0
ALDOB	1	0	0
ALDOC	0	0	0
ALG1	0	0	0
ALG10	1	0	0
ALG11	0	0	1
ALG12	0	0	0
ALG14	1	0	0
ALG1L	0	0	0
ALG5	0	0	0
ALG6	1	0	0
ALG8	0	0	0
ALG9	0	0	0
ALK	0	0	0
ALKBH1	0	0	1
ALKBH2	0	0	0
ALKBH3	1	0	0
ALKBH4	0	0	0
ALKBH5	0	0	0
ALKBH6	0	0	0
ALKBH7	0	0	0
ALKBH8	0	0	0
ALLC	0	0	0
ALMS1	1	0	0
ALOX12	1	0	0
ALOX12B	0	0	0
ALOX15	0	0	0
ALOX15B	0	0	0
ALOX5	1	0	0
ALOX5AP	0	0	1
ALOXE3	0	0	0
ALPI	0	0	0
ALPK1	0	0	1
ALPK2	1	0	0
ALPK3	0	0	0
ALPL	0	0	0
ALPP	0	0	0
ALPPL2	1	0	0
ALS2	1	0	0
ALS2CR11	0	0	0
ALS2CR12	0	0	0
ALX1	1	0	0
ALX3	0	0	0
ALX4	0	0	0
ALYREF	0	0	1
AMACR	0	0	0
AMBN	1	0	0
AMBP	1	0	0
AMBRA1	0	0	0
AMDHD1	1	0	0
AMDHD2	0	0	0
AMFR	0	0	1
AMH	0	0	0
AMHR2	0	1	0
AMIGO1	0	0	0
AMIGO3	0	0	0
AMMECR1L	0	0	0
AMN	1	0	0
AMOTL1	0	0	0
AMOTL2	1	0	0
AMPD1	1	0	0
AMPD2	0	0	0
AMPD3	0	1	1
AMPH	1	0	0
AMT	0	0	0
AMTN	0	0	0
AMY2A	0	0	0
AMY2B	0	1	1
AMZ1	1	0	0
AMZ2	0	0	0
ANAPC11	0	0	0
ANAPC13	0	0	1
ANAPC16	0	0	0
ANAPC2	0	0	0
ANAPC4	0	0	0
ANAPC5	0	0	0
ANAPC7	0	0	0
ANG	0	0	0
ANGEL1	1	0	0
ANGEL2	0	0	0
ANGPT1	0	1	1
ANGPT2	0	1	0
ANGPT4	1	0	0
ANGPTL1	0	0	0
ANGPTL2	0	0	0
ANGPTL3	0	0	0
ANGPTL4	1	0	0
ANGPTL5	0	0	0
ANGPTL6	0	0	0
ANK1	0	0	0
ANK2	0	0	0
ANK3	1	1	1
ANKAR	0	0	1
ANKDD1A	0	0	0
ANKFN1	0	0	0
ANKFY1	0	0	0
ANKH	1	0	0
ANKHD1	0	0	0
ANKHD1-EIF4EBP3	0	0	0
ANKIB1	0	0	1
ANKK1	0	0	0
ANKLE1	1	0	0
ANKLE2	0	0	1
ANKMY1	0	0	0
ANKMY2	0	0	1
ANKRA2	0	1	0
ANKRD1	0	0	0
ANKRD10	1	0	0
ANKRD11	0	0	1
ANKRD12	0	1	1
ANKRD13A	0	0	0
ANKRD13B	0	0	0
ANKRD13C	0	0	0
ANKRD13D	0	0	0
ANKRD16	0	0	0
ANKRD17	1	0	1
ANKRD18A	1	0	0
ANKRD18B	1	0	0
ANKRD2	0	0	0
ANKRD20A3	0	0	0
ANKRD22	0	0	0
ANKRD23	0	0	0
ANKRD24	0	0	0
ANKRD26	0	0	0
ANKRD27	1	0	0
ANKRD28	0	0	0
ANKRD29	1	0	0
ANKRD30A	1	0	0
ANKRD30B	0	0	0
ANKRD31	1	0	0
ANKRD33	0	0	0
ANKRD33B	1	0	0
ANKRD34A	0	0	0
ANKRD34B	1	0	0
ANKRD34C	1	0	0
ANKRD36	1	0	0
ANKRD37	0	0	0
ANKRD39	0	0	0
ANKRD40	0	0	0
ANKRD42	0	0	0
ANKRD44	0	0	1
ANKRD45	1	0	1
ANKRD46	1	0	0
ANKRD49	0	0	1
ANKRD50	1	0	0
ANKRD52	0	0	0
ANKRD53	0	0	0
ANKRD55	1	0	0
ANKRD6	1	1	0
ANKRD63	1	0	0
ANKRD65	0	0	0
ANKRD7	1	0	0
ANKRD9	0	0	0
ANKS1B	1	0	0
ANKS3	0	0	1
ANKS4B	0	0	0
ANKS6	0	0	0
ANKUB1	0	0	0
ANKZF1	0	1	0
ANLN	0	0	1
ANO1	1	0	0
ANO10	0	0	0
ANO3	1	0	0
ANO4	1	0	0
ANO5	0	0	0
ANO7	0	0	0
ANO8	0	0	0
ANO9	1	0	0
ANP32A	1	0	0
ANP32B	1	0	0
ANP32D	0	0	0
ANP32E	0	0	0
ANPEP	0	0	0
ANTXR1	1	1	1
ANTXR2	0	0	1
ANXA1	0	0	0
ANXA11	0	0	0
ANXA13	0	0	0
ANXA3	1	0	0
ANXA4	0	0	0
ANXA5	1	0	0
ANXA6	0	1	0
ANXA7	0	0	0
ANXA9	0	0	0
AOAH	1	0	1
AOC2	0	0	0
AOC3	0	0	0
AOX1	0	1	0
AP1AR	1	0	0
AP1B1	0	0	0
AP1G1	0	0	0
AP1G2	0	1	0
AP1M1	0	0	0
AP1M2	0	0	0
AP1S1	0	0	0
AP1S3	0	0	0
AP2A1	0	0	0
AP2A2	0	0	0
AP2B1	0	0	0
AP2M1	0	0	0
AP2S1	0	0	0
AP3B1	1	0	0
AP3B2	1	1	0
AP3D1	0	0	0
AP3M1	0	0	0
AP3M2	0	0	0
AP3S1	0	0	0
AP4E1	0	0	0
AP4S1	0	0	0
AP5B1	1	1	0
APAF1	1	0	0
APBA1	0	0	1
APBA2	0	0	0
APBA3	0	0	0
APBB1	0	0	0
APBB1IP	1	0	0
APBB2	0	0	0
APBB3	1	1	0
APC	1	0	1
APC2	0	0	0
APCDD1	0	0	0
APCDD1L	0	0	0
APCS	0	0	0
APEH	0	0	0
APH1A	0	0	0
APH1B	0	1	0
API5	1	0	0
APIP	0	0	0
APITD1	0	0	0
APITD1-CORT	0	0	0
APLF	1	0	1
APLNR	0	0	0
APLP1	0	0	1
APLP2	0	0	1
APOA1	0	0	0
APOA1BP	0	0	0
APOA2	0	0	0
APOA4	0	0	0
APOA5	0	0	0
APOB	0	0	0
APOBEC1	1	0	0
APOBEC2	0	0	0
APOBEC3A	1	0	0
APOBEC3B	0	0	0
APOBEC3C	0	0	0
APOBEC3F	0	0	0
APOBEC3G	0	0	0
APOBEC3H	0	0	0
APOBEC4	0	0	0
APOBR	0	0	0
APOC1	0	0	0
APOC3	0	0	0
APOC4	0	0	0
APOC4-APOC2	0	0	0
APOD	0	0	0
APOE	1	0	0
APOF	1	0	0
APOH	0	0	0
APOL1	0	0	0
APOL2	0	0	0
APOL3	0	0	0
APOL4	0	0	0
APOL5	0	0	0
APOL6	1	0	0
APOLD1	0	0	0
APOM	0	0	0
APOPT1	0	0	1
APP	0	0	1
APPBP2	0	0	1
APPL1	0	0	0
APPL2	1	1	0
APRT	0	0	0
APTX	0	0	0
AQP10	0	0	0
AQP11	0	0	1
AQP12A	0	0	0
AQP12B	1	0	0
AQP2	0	0	0
AQP3	0	0	0
AQP4	0	0	0
AQP5	1	0	0
AQP6	0	1	0
AQP7	0	0	0
AQP8	0	0	0
AQP9	1	0	0
AQR	0	0	0
ARAP1	0	1	1
ARAP2	1	0	0
ARAP3	0	0	0
ARC	1	0	0
ARCN1	0	0	0
AREG	0	0	0
ARF1	0	0	0
ARF3	0	0	0
ARF4	0	0	0
ARF5	1	0	0
ARF6	0	0	0
ARFGAP1	0	0	0
ARFGAP2	0	0	0
ARFGAP3	0	0	0
ARFGEF1	1	0	0
ARFGEF2	0	0	0
ARFIP1	0	0	0
ARG1	0	0	0
ARG2	0	0	0
ARGFX	1	0	0
ARGLU1	1	0	1
ARHGAP1	0	0	0
ARHGAP10	0	0	1
ARHGAP11A	0	0	0
ARHGAP11B	0	0	0
ARHGAP12	1	0	0
ARHGAP15	1	0	1
ARHGAP17	0	0	0
ARHGAP18	1	1	0
ARHGAP19	0	0	0
ARHGAP20	1	0	0
ARHGAP21	0	0	0
ARHGAP22	1	1	0
ARHGAP23	1	0	1
ARHGAP24	1	0	0
ARHGAP25	1	0	0
ARHGAP26	0	1	0
ARHGAP27	1	1	0
ARHGAP28	0	0	1
ARHGAP29	1	0	0
ARHGAP30	0	0	0
ARHGAP31	0	0	0
ARHGAP32	1	1	0
ARHGAP33	0	0	0
ARHGAP35	0	0	0
ARHGAP39	0	0	0
ARHGAP40	1	0	0
ARHGAP42	1	0	1
ARHGAP44	0	0	1
ARHGAP5	0	0	0
ARHGAP8	1	0	0
ARHGAP9	0	0	0
ARHGDIA	0	0	0
ARHGDIG	0	0	0
ARHGEF1	1	0	1
ARHGEF10	0	0	1
ARHGEF11	1	0	0
ARHGEF12	0	0	1
ARHGEF15	1	0	0
ARHGEF16	0	0	0
ARHGEF17	0	1	0
ARHGEF18	0	0	1
ARHGEF19	0	0	0
ARHGEF2	0	0	0
ARHGEF25	0	1	0
ARHGEF26	1	0	0
ARHGEF33	1	0	0
ARHGEF38	0	0	0
ARHGEF4	0	0	0
ARHGEF40	1	0	0
ARHGEF5	0	0	0
ARHGEF7	0	0	0
ARID1A	0	0	0
ARID1B	0	0	1
ARID2	1	0	0
ARID3A	0	0	0
ARID3B	1	0	0
ARID3C	1	0	0
ARID4A	0	0	0
ARID4B	0	0	1
ARID5A	1	0	0
ARID5B	0	0	0
ARIH1	1	0	0
ARIH2	0	0	0
ARL1	0	0	1
ARL10	0	0	0
ARL11	0	0	0
ARL13B	0	0	0
ARL14	0	0	0
ARL15	1	1	1
ARL16	0	0	0
ARL2	0	0	0
ARL2BP	0	0	0
ARL3	0	0	0
ARL4A	1	0	1
ARL4C	0	0	0
ARL4D	0	0	0
ARL5A	1	0	0
ARL5B	0	0	0
ARL5C	0	0	0
ARL6	0	0	0
ARL6IP1	0	0	0
ARL6IP4	0	0	0
ARL6IP5	0	0	0
ARL6IP6	0	0	0
ARL8A	0	0	0
ARL8B	0	0	0
ARL9	0	0	0
ARMC1	1	0	0
ARMC10	0	0	0
ARMC12	0	0	0
ARMC2	0	0	0
ARMC3	0	0	1
ARMC4	1	0	0
ARMC5	0	0	0
ARMC7	0	0	0
ARMC8	1	0	0
ARMC9	0	1	0
ARMS2	0	0	0
ARNT	0	0	0
ARNT2	0	1	0
ARNTL	1	0	0
ARNTL2	1	0	0
ARPC1A	0	0	0
ARPC1B	0	0	0
ARPC2	0	0	0
ARPC4	0	0	0
ARPC4-TTLL3	0	0	0
ARPC5	1	0	1
ARPP19	0	0	0
ARPP21	1	0	0
ARRB1	0	0	0
ARRB2	0	0	0
ARRDC1	0	0	0
ARRDC2	0	0	0
ARRDC3	1	0	0
ARRDC4	1	0	1
ARRDC5	0	0	0
ARSA	0	1	0
ARSB	1	0	0
ARSG	0	1	0
ARSI	0	0	0
ARSJ	1	0	0
ARSK	0	0	0
ART1	0	0	0
ART3	0	0	1
ART4	0	0	0
ART5	0	0	0
ARTN	0	0	1
ARV1	0	0	1
ARVCF	0	0	1
AS3MT	0	0	0
ASAH1	0	1	0
ASAH2	1	0	0
ASAH2B	1	0	0
ASAP1	0	0	1
ASAP2	1	0	0
ASAP3	0	0	0
ASB1	1	0	0
ASB10	0	0	0
ASB13	0	0	0
ASB14	1	0	0
ASB15	1	0	0
ASB16	0	0	0
ASB17	1	0	0
ASB18	0	0	0
ASB3	0	0	0
ASB4	1	0	0
ASB5	1	0	1
ASB6	0	0	0
ASB7	0	0	1
ASB8	1	0	0
ASCC1	0	0	0
ASCC2	0	0	0
ASCC3	1	0	1
ASCL1	1	0	0
ASCL2	0	0	0
ASCL3	0	0	0
ASCL4	1	0	0
ASF1A	0	0	0
ASF1B	0	0	0
ASGR1	0	0	0
ASGR2	0	0	0
ASH1L	0	0	1
ASH2L	0	0	0
ASIP	0	0	0
ASL	0	0	0
ASNA1	0	0	0
ASNS	1	0	0
ASNSD1	0	0	0
ASPA	0	0	0
ASPDH	0	0	0
ASPG	0	0	0
ASPH	1	0	1
ASPHD1	0	0	0
ASPHD2	1	0	0
ASPM	0	0	0
ASPN	0	0	0
ASPRV1	0	0	0
ASPSCR1	0	0	0
ASRGL1	0	0	0
ASS1	0	0	0
ASTE1	0	0	0
ASTL	0	0	0
ASTN1	0	0	0
ASTN2	1	0	0
ASUN	0	0	0
ASXL1	0	0	0
ASXL2	1	0	1
ASZ1	1	0	0
ATAD1	0	0	1
ATAD2	0	0	0
ATAD2B	0	0	0
ATAD3A	0	0	0
ATAD3B	0	0	0
ATAD3C	0	0	0
ATAD5	0	0	0
ATAT1	0	0	0
ATCAY	0	0	0
ATE1	0	0	0
ATF1	0	0	0
ATF2	0	0	0
ATF3	0	0	0
ATF4	0	0	0
ATF5	0	0	0
ATF6	0	0	1
ATF6B	0	0	0
ATF7	0	0	1
ATF7IP	1	0	0
ATF7IP2	0	0	0
ATG10	0	0	1
ATG12	0	0	0
ATG13	0	0	1
ATG14	1	0	0
ATG16L1	0	0	0
ATG16L2	0	0	0
ATG2A	0	0	0
ATG2B	0	0	0
ATG3	0	0	0
ATG4B	0	0	1
ATG4C	1	0	0
ATG4D	0	0	0
ATG5	1	0	1
ATG7	1	0	1
ATG9B	0	0	0
ATHL1	0	0	0
ATIC	0	0	0
ATL1	0	0	0
ATL2	1	0	1
ATL3	1	0	0
ATM	0	0	0
ATMIN	0	0	0
ATN1	0	0	0
ATOH7	1	0	0
ATOH8	1	0	0
ATOX1	0	0	0
ATP10A	0	0	0
ATP10B	0	0	0
ATP10D	0	0	0
ATP11A	1	1	1
ATP11B	1	0	0
ATP12A	0	0	0
ATP13A1	0	0	0
ATP13A2	0	0	0
ATP13A3	0	0	1
ATP13A4	1	0	0
ATP13A5	1	0	0
ATP1A1	0	0	0
ATP1A2	0	0	0
ATP1A3	0	0	0
ATP1A4	1	0	0
ATP1B2	1	0	0
ATP1B3	0	0	0
ATP2A1	0	0	0
ATP2A2	0	0	0
ATP2A3	0	0	0
ATP2B1	1	0	0
ATP2B2	1	0	0
ATP2C1	0	0	1
ATP2C2	0	0	1
ATP4A	0	0	0
ATP4B	0	0	1
ATP5A1	0	0	0
ATP5B	0	0	0
ATP5C1	0	0	0
ATP5D	0	0	0
ATP5E	0	0	0
ATP5F1	0	0	0
ATP5G1	1	0	0
ATP5G2	0	0	0
ATP5J	1	0	0
ATP5J2	0	0	0
ATP5J2-PTCD1	0	0	0
ATP5L2	0	0	0
ATP5O	0	0	0
ATP5S	0	0	0
ATP5SL	0	0	0
ATP6AP1L	0	0	0
ATP6V0A1	0	0	0
ATP6V0A2	0	0	1
ATP6V0A4	0	0	0
ATP6V0C	0	0	0
ATP6V0D1	0	0	0
ATP6V0D2	0	0	0
ATP6V0E1	0	0	1
ATP6V0E2	0	0	0
ATP6V1A	0	0	0
ATP6V1B1	0	0	0
ATP6V1B2	0	0	1
ATP6V1C1	1	0	0
ATP6V1C2	0	0	1
ATP6V1E2	0	0	0
ATP6V1F	1	0	0
ATP6V1G1	1	0	0
ATP6V1G2	0	0	0
ATP6V1G3	1	0	1
ATP6V1H	1	0	0
ATP7B	0	1	0
ATP8A1	0	1	0
ATP8A2	1	0	0
ATP8B1	0	0	0
ATP8B2	0	0	0
ATP8B3	1	0	0
ATP8B4	1	0	0
ATP9A	1	1	1
ATP9B	0	0	1
ATPAF1	0	0	0
ATPAF2	0	0	0
ATPIF1	0	0	0
ATR	0	0	0
ATRIP	0	0	0
ATRN	1	0	0
ATRNL1	1	1	1
ATXN1	1	0	0
ATXN10	0	0	0
ATXN1L	1	0	0
ATXN2	0	0	1
ATXN2L	0	0	0
ATXN7	0	0	1
ATXN7L1	0	0	1
ATXN7L2	0	0	0
ATXN7L3B	1	0	0
AUH	1	0	0
AURKA	0	0	0
AURKAIP1	0	0	0
AURKB	0	0	0
AURKC	0	0	0
AUTS2	1	0	1
AVEN	0	0	0
AVIL	0	0	0
AVL9	0	0	0
AVP	0	0	0
AVPI1	0	0	0
AVPR1A	1	0	0
AVPR1B	1	0	0
AXDND1	1	0	0
AXIN1	0	0	1
AXIN2	0	0	0
AXL	1	0	0
AZGP1	1	0	0
AZI2	0	0	0
AZIN1	0	0	0
AZU1	0	0	0
B3GALNT1	0	0	0
B3GALNT2	0	0	0
B3GALT1	1	0	0
B3GALT2	0	0	0
B3GALT4	0	0	0
B3GALT6	0	0	0
B3GAT1	1	1	1
B3GAT2	1	0	0
B3GAT3	0	0	0
B3GNT2	0	0	0
B3GNT3	1	0	0
B3GNT4	1	0	0
B3GNT5	1	0	0
B3GNT6	1	0	0
B3GNT7	0	0	0
B3GNT8	0	0	0
B3GNT9	0	0	0
B3GNTL1	0	0	0
B4GALNT1	0	0	0
B4GALNT2	1	0	0
B4GALNT3	1	1	0
B4GALNT4	1	1	0
B4GALT1	0	0	0
B4GALT2	0	0	0
B4GALT3	0	0	0
B4GALT4	0	0	0
B4GALT5	0	0	0
B4GALT6	0	0	0
B4GALT7	0	0	0
B9D1	0	0	1
B9D2	0	0	0
BAALC	0	0	0
BAAT	0	0	0
BABAM1	0	0	0
BACE1	0	0	0
BACE2	0	0	0
BACH1	1	0	0
BACH2	1	0	0
BAG2	0	0	0
BAG3	0	0	0
BAG5	0	0	0
BAG6	0	0	0
BAHD1	0	0	0
BAIAP2	0	1	1
BAIAP2L1	1	0	0
BAIAP2L2	0	0	0
BAIAP3	1	0	0
BAK1	0	0	0
BAMBI	0	0	0
BANF1	0	0	0
BANF2	1	0	0
BANK1	1	0	0
BANP	0	0	1
BAP1	0	0	0
BARD1	0	0	0
BARHL1	0	0	0
BARHL2	1	0	0
BARX1	0	0	0
BARX2	0	0	0
BASP1	1	0	0
BATF	0	0	0
BATF2	0	0	0
BATF3	1	0	0
BAX	0	0	0
BAZ1A	0	0	0
BAZ1B	0	0	0
BAZ2A	0	0	0
BAZ2B	0	0	0
BBC3	0	1	0
BBIP1	0	0	0
BBOX1	0	0	0
BBS1	0	1	0
BBS10	1	0	0
BBS12	1	0	0
BBS2	0	1	0
BBS5	0	0	0
BBS7	1	0	0
BBS9	1	1	0
BBX	1	1	1
BCAM	1	0	0
BCAN	0	0	0
BCAP29	0	0	1
BCAR1	0	0	0
BCAR3	1	0	0
BCAS1	1	0	0
BCAS2	1	0	1
BCAS3	0	0	1
BCAS4	0	0	0
BCAT2	0	0	0
BCCIP	0	0	1
BCDIN3D	1	0	0
BCHE	0	0	1
BCKDHA	0	0	0
BCKDHB	0	0	0
BCKDK	0	0	0
BCL10	0	0	0
BCL11A	1	0	0
BCL11B	1	0	1
BCL2A1	0	0	0
BCL2L1	0	0	0
BCL2L10	0	0	0
BCL2L11	1	0	0
BCL2L12	0	0	0
BCL2L13	0	0	0
BCL2L14	0	0	0
BCL2L15	0	0	0
BCL2L2-PABPN1	0	0	0
BCL3	0	0	0
BCL6	1	0	1
BCL6B	0	0	0
BCL7A	0	0	0
BCL7B	1	0	0
BCL7C	0	0	0
BCL9	0	0	0
BCL9L	0	0	0
BCLAF1	0	0	0
BCO2	0	0	1
BCR	0	0	0
BCS1L	0	0	0
BDH1	0	0	1
BDH2	0	0	0
BDKRB1	0	0	0
BDKRB2	0	0	0
BDNF	1	0	0
BDP1	1	0	0
BEAN1	1	0	0
BECN1	0	0	0
BEGAIN	1	0	0
BEND3	0	0	0
BEND4	1	0	0
BEND5	1	0	0
BEND6	1	0	0
BEND7	0	0	1
BEST1	0	0	0
BEST2	0	0	0
BEST3	1	0	0
BEST4	0	0	0
BET1	1	0	0
BFAR	0	0	1
BFSP1	1	0	0
BFSP2	0	0	0
BGLAP	0	0	0
BHLHA15	0	0	0
BHLHA9	1	0	0
BHLHE22	1	0	0
BHLHE23	0	0	0
BHLHE40	0	0	0
BHLHE41	1	0	1
BHMT	1	0	0
BHMT2	1	0	0
BICC1	0	0	1
BICD1	0	0	0
BICD2	1	0	1
BID	0	0	0
BIK	1	0	0
BIN1	1	1	0
BIN2	0	0	0
BIN3	0	0	0
BIRC2	1	0	0
BIRC3	1	0	0
BIRC5	0	0	0
BIRC6	0	0	0
BIRC7	0	0	0
BIRC8	0	0	0
BIVM	0	0	0
BIVM-ERCC5	0	0	0
BLCAP	0	0	0
BLID	1	0	0
BLK	1	1	0
BLM	0	0	0
BLMH	1	0	0
BLNK	1	0	0
BLOC1S1	0	0	0
BLOC1S3	0	0	0
BLVRA	0	0	0
BLVRB	1	0	0
BLZF1	0	0	0
BMF	1	1	1
BMI1	1	0	0
BMP1	0	0	0
BMP10	1	0	0
BMP2	1	0	0
BMP2K	0	0	0
BMP3	0	0	0
BMP4	1	0	0
BMP5	0	0	0
BMP6	1	0	0
BMP7	0	0	0
BMP8A	1	0	0
BMP8B	0	0	0
BMPER	1	0	0
BMPR1A	0	0	0
BMPR1B	0	0	0
BMPR2	0	0	0
BMS1	1	0	0
BNC1	1	0	0
BNC2	1	0	0
BNIP1	1	0	0
BNIP2	1	0	1
BNIP3	0	0	0
BNIP3L	1	1	0
BNIPL	0	0	0
BOC	1	0	0
BOD1	0	0	0
BOLA1	0	0	0
BOLA3	0	0	0
BOLL	1	0	0
BOP1	0	0	0
BORA	0	0	0
BPGM	1	0	0
BPI	0	0	0
BPIFA1	0	0	0
BPIFA2	0	0	0
BPIFA3	0	0	0
BPIFB1	1	0	0
BPIFB2	0	0	0
BPIFB3	0	0	0
BPIFB4	1	0	0
BPIFB6	0	0	0
BPIFC	1	0	0
BPNT1	0	0	0
BPTF	0	0	1
BRAF	0	0	1
BRAP	0	0	0
BRAT1	0	0	0
BRCA1	0	0	0
BRCA2	0	0	0
BRD2	0	0	0
BRD3	0	0	0
BRD4	0	0	0
BRD7	0	0	0
BRD8	0	0	0
BRD9	1	0	0
BRDT	1	0	0
BRE	0	0	1
BRF1	0	0	0
BRF2	0	0	0
BRI3	0	0	0
BRI3BP	0	0	0
BRIP1	0	0	0
BRIX1	0	0	1
BRK1	0	0	0
BRMS1	0	0	0
BRMS1L	1	0	1
BROX	0	0	0
BRPF1	1	0	0
BRPF3	0	0	0
BRSK1	0	0	0
BRSK2	1	1	1
BRWD1	0	0	0
BSCL2	0	0	0
BSDC1	0	0	0
BSG	1	0	0
BSN	0	0	1
BSND	0	0	0
BSPH1	0	0	0
BSPRY	1	0	0
BST1	1	0	0
BSX	1	0	0
BTAF1	0	0	1
BTBD1	0	0	0
BTBD10	1	0	1
BTBD11	1	0	0
BTBD16	1	0	0
BTBD17	0	1	0
BTBD18	0	0	0
BTBD19	0	0	0
BTBD2	0	0	0
BTBD7	0	0	0
BTBD8	1	0	0
BTBD9	0	0	1
BTC	1	0	0
BTD	0	0	0
BTF3	1	0	0
BTF3L4	0	0	0
BTG2	0	1	0
BTG3	1	0	0
BTG4	1	0	0
BTLA	0	0	0
BTN1A1	1	0	0
BTN2A1	0	0	0
BTN2A2	0	1	1
BTN3A1	0	0	0
BTN3A2	0	0	0
BTN3A3	0	0	0
BTNL3	0	0	0
BTNL8	0	0	0
BTNL9	0	0	0
BTRC	0	0	0
BUB1	1	0	0
BUB1B	0	0	0
BUB3	0	0	0
BUD13	0	0	1
BUD31	0	0	0
BVES	0	0	0
BYSL	0	0	0
BZW1	1	0	0
C10orf105	0	0	0
C10orf107	1	0	0
C10orf11	1	0	0
C10orf113	0	0	0
C10orf12	0	0	0
C10orf120	1	0	0
C10orf128	1	0	0
C10orf131	1	0	1
C10orf2	0	0	0
C10orf35	0	0	0
C10orf53	0	0	0
C10orf54	0	0	0
C10orf55	0	0	0
C10orf62	0	0	0
C10orf67	1	0	0
C10orf71	0	0	0
C10orf76	0	0	0
C10orf82	0	0	0
C10orf88	0	0	0
C10orf90	1	0	0
C10orf99	1	0	0
C11orf1	0	1	0
C11orf16	0	0	0
C11orf24	0	0	0
C11orf31	0	0	0
C11orf40	0	0	0
C11orf42	0	0	0
C11orf45	1	0	1
C11orf49	0	0	0
C11orf52	0	0	0
C11orf53	1	0	0
C11orf54	0	0	0
C11orf57	1	0	0
C11orf58	1	0	0
C11orf63	1	0	0
C11orf65	1	0	0
C11orf68	0	0	0
C11orf70	1	1	0
C11orf71	0	0	0
C11orf74	0	0	0
C11orf80	0	0	0
C11orf84	0	0	0
C11orf85	1	0	0
C11orf86	0	0	0
C11orf87	1	0	0
C11orf88	1	0	0
C11orf91	1	0	0
C11orf94	0	0	0
C12orf10	0	0	0
C12orf29	0	0	0
C12orf4	0	0	0
C12orf40	1	0	0
C12orf42	0	0	1
C12orf43	0	0	0
C12orf45	0	0	0
C12orf49	1	0	0
C12orf50	0	0	0
C12orf54	0	0	0
C12orf56	0	0	0
C12orf57	0	0	0
C12orf60	0	0	0
C12orf65	0	0	0
C12orf66	1	0	0
C12orf73	0	0	0
C12orf74	0	0	0
C12orf75	0	0	0
C12orf76	0	1	0
C14orf1	0	0	0
C14orf105	1	0	0
C14orf142	0	0	0
C14orf159	0	0	0
C14orf166	0	0	0
C14orf177	0	0	0
C14orf178	0	0	0
C14orf180	0	0	0
C14orf2	0	0	0
C14orf28	1	0	0
C14orf37	0	0	0
C14orf39	0	0	0
C14orf79	0	0	0
C14orf80	0	0	0
C14orf93	0	0	0
C15orf38-AP3S2	0	0	0
C15orf39	0	0	0
C15orf40	0	0	0
C15orf41	0	0	1
C15orf43	0	0	0
C15orf48	0	0	0
C15orf52	0	0	0
C15orf53	1	0	0
C15orf57	0	0	0
C15orf59	1	0	0
C15orf61	0	0	0
C15orf62	0	0	0
C16orf13	0	0	0
C16orf45	1	0	1
C16orf46	0	0	0
C16orf52	0	0	0
C16orf54	0	0	0
C16orf58	1	0	0
C16orf59	0	0	0
C16orf62	0	0	0
C16orf70	0	0	0
C16orf71	0	0	0
C16orf72	0	0	0
C16orf74	1	0	0
C16orf78	0	0	0
C16orf87	0	0	1
C16orf89	0	0	0
C16orf90	0	0	0
C16orf92	0	0	0
C16orf95	1	0	0
C16orf96	0	0	0
C17orf100	0	0	0
C17orf105	1	0	0
C17orf107	0	0	0
C17orf47	0	0	0
C17orf49	0	0	0
C17orf50	0	0	0
C17orf51	1	0	0
C17orf53	0	0	0
C17orf58	0	0	0
C17orf62	0	0	0
C17orf64	0	0	0
C17orf67	1	0	0
C17orf74	0	0	0
C17orf75	0	0	1
C17orf78	0	0	0
C17orf80	0	0	0
C17orf89	0	0	0
C17orf96	1	0	0
C17orf97	0	0	0
C17orf98	0	0	0
C17orf99	0	0	0
C18orf21	1	0	0
C18orf25	0	0	0
C18orf32	0	0	0
C18orf42	0	0	0
C18orf54	0	0	0
C18orf63	0	0	0
C18orf8	0	0	0
C19orf12	0	0	0
C19orf18	0	0	0
C19orf24	0	0	0
C19orf25	0	0	0
C19orf33	0	0	0
C19orf35	1	0	1
C19orf38	0	0	0
C19orf44	0	0	0
C19orf45	0	0	0
C19orf47	0	0	0
C19orf48	1	0	0
C19orf53	0	0	0
C19orf54	0	0	0
C19orf57	0	0	0
C19orf60	0	0	0
C19orf66	0	0	0
C19orf70	0	0	0
C19orf71	0	0	0
C19orf73	0	0	0
C19orf81	1	0	0
C1D	0	0	0
C1GALT1	1	0	1
C1orf100	0	0	0
C1orf101	1	0	0
C1orf105	0	0	0
C1orf106	1	0	0
C1orf109	0	0	0
C1orf111	0	0	0
C1orf112	0	0	0
C1orf115	1	0	0
C1orf116	1	0	0
C1orf122	0	0	0
C1orf123	0	0	0
C1orf127	0	0	0
C1orf131	0	0	0
C1orf146	1	0	1
C1orf158	0	0	0
C1orf159	1	0	1
C1orf162	1	0	0
C1orf168	1	0	0
C1orf174	0	0	0
C1orf185	1	0	0
C1orf186	1	0	0
C1orf194	1	0	0
C1orf198	0	0	0
C1orf204	0	0	0
C1orf21	0	1	1
C1orf210	0	0	0
C1orf216	0	0	0
C1orf226	0	0	0
C1orf228	0	0	0
C1orf233	0	0	0
C1orf35	0	0	1
C1orf43	0	0	1
C1orf50	0	0	0
C1orf52	0	0	0
C1orf53	0	0	0
C1orf54	0	0	0
C1orf56	0	0	0
C1orf61	1	0	0
C1orf64	0	0	0
C1orf68	0	0	0
C1orf74	0	0	0
C1orf87	0	0	0
C1orf94	0	0	0
C1orf95	1	0	0
C1QA	0	0	0
C1QB	0	0	0
C1QC	0	0	0
C1QL1	1	0	0
C1QL2	0	0	0
C1QL3	1	0	0
C1QL4	0	0	0
C1QTNF1	1	0	0
C1QTNF2	1	0	0
C1QTNF3	0	0	0
C1QTNF4	1	0	0
C1QTNF5	0	0	0
C1QTNF6	0	0	0
C1QTNF7	1	0	0
C1QTNF8	1	0	0
C1QTNF9	0	0	0
C1QTNF9B	1	0	0
C1RL	1	0	0
C1S	0	0	0
C2	0	0	0
C20orf141	1	0	0
C20orf144	0	0	0
C20orf173	0	0	0
C20orf194	0	1	0
C20orf195	0	0	0
C20orf196	1	0	0
C20orf202	0	0	0
C20orf24	0	0	0
C20orf27	0	0	0
C20orf85	0	0	0
C20orf96	0	0	1
C21orf2	0	0	0
C21orf33	1	0	0
C21orf58	0	0	0
C21orf59	0	0	0
C21orf62	0	0	0
C21orf91	0	0	0
C22orf15	0	0	0
C22orf23	0	0	0
C22orf29	0	0	0
C22orf31	0	0	0
C22orf39	0	0	0
C22orf42	0	0	0
C22orf46	0	1	0
C2CD2	0	0	0
C2CD2L	0	0	0
C2CD3	0	0	1
C2CD4A	1	0	0
C2CD4B	1	0	0
C2CD4C	1	0	0
C2CD4D	0	0	0
C2orf15	1	0	0
C2orf16	1	0	0
C2orf40	1	0	0
C2orf42	0	0	0
C2orf44	0	0	0
C2orf47	0	0	1
C2orf49	0	0	1
C2orf50	1	0	0
C2orf54	0	0	0
C2orf61	0	0	0
C2orf66	1	0	0
C2orf68	0	0	0
C2orf69	1	0	0
C2orf70	0	0	0
C2orf71	0	0	0
C2orf72	1	0	0
C2orf73	0	0	0
C2orf74	0	0	0
C2orf76	0	0	0
C2orf78	0	0	0
C2orf80	0	0	0
C2orf81	0	0	0
C2orf82	1	0	0
C2orf83	1	0	0
C2orf88	1	0	0
C2orf91	1	0	0
C3	0	0	0
C3AR1	0	0	0
C3orf14	1	0	1
C3orf17	1	1	0
C3orf18	0	0	0
C3orf20	0	0	0
C3orf22	0	0	0
C3orf30	0	0	0
C3orf33	0	0	1
C3orf36	1	0	0
C3orf38	0	0	0
C3orf52	1	0	0
C3orf58	1	0	0
C3orf62	0	0	0
C3orf67	1	0	0
C3orf70	1	0	1
C3orf80	1	0	0
C4A	0	0	0
C4B	0	0	0
C4BPA	1	0	0
C4BPB	1	0	0
C4orf17	1	0	1
C4orf19	1	0	1
C4orf22	1	0	0
C4orf26	1	0	0
C4orf27	1	0	0
C4orf3	1	0	0
C4orf32	1	0	0
C4orf33	0	0	0
C4orf36	0	0	0
C4orf45	1	0	0
C4orf46	0	0	0
C4orf47	1	0	0
C4orf48	1	0	0
C4orf51	1	0	0
C5	0	0	0
C5AR1	0	0	0
C5orf15	0	0	1
C5orf22	0	0	1
C5orf24	0	0	0
C5orf28	0	0	0
C5orf30	0	0	1
C5orf34	0	0	0
C5orf38	0	0	0
C5orf42	0	0	0
C5orf45	0	0	0
C5orf46	1	0	0
C5orf47	1	0	1
C5orf49	1	0	0
C5orf51	1	0	1
C5orf52	0	0	0
C5orf63	1	0	1
C6	0	0	0
C6orf1	0	0	0
C6orf10	1	0	1
C6orf106	0	0	1
C6orf118	1	0	0
C6orf120	0	0	0
C6orf132	0	0	0
C6orf136	0	0	1
C6orf141	1	0	0
C6orf15	0	0	0
C6orf163	0	0	0
C6orf201	1	0	0
C6orf203	1	0	0
C6orf222	0	0	0
C6orf223	0	0	0
C6orf226	0	0	0
C6orf25	0	0	0
C6orf47	0	0	0
C6orf48	0	0	0
C6orf52	0	0	0
C6orf58	1	0	0
C6orf62	0	0	0
C6orf89	0	0	0
C7	0	1	0
C7orf25	1	0	0
C7orf26	0	0	0
C7orf31	1	0	0
C7orf33	1	0	0
C7orf34	0	0	0
C7orf43	0	0	0
C7orf49	0	0	0
C7orf50	0	0	1
C7orf57	1	0	0
C7orf60	1	1	1
C7orf61	0	0	0
C7orf62	1	0	0
C7orf72	0	0	0
C7orf73	0	0	0
C8A	0	0	0
C8B	0	0	0
C8orf22	1	0	0
C8orf33	1	0	0
C8orf34	0	0	0
C8orf37	1	0	0
C8orf4	1	0	0
C8orf44-SGK3	0	0	0
C8orf46	1	0	0
C8orf48	1	0	0
C8orf58	0	0	0
C8orf59	0	0	1
C8orf74	0	0	0
C8orf76	0	0	0
C8orf82	0	0	0
C8orf86	0	0	0
C9	1	0	0
C9orf116	0	0	0
C9orf129	1	0	0
C9orf131	0	0	0
C9orf135	0	0	0
C9orf142	0	0	0
C9orf152	1	0	0
C9orf16	0	0	0
C9orf172	1	0	0
C9orf173	0	0	0
C9orf24	1	0	0
C9orf3	0	0	1
C9orf40	0	0	0
C9orf43	0	0	0
C9orf47	0	0	0
C9orf50	0	0	0
C9orf57	0	0	0
C9orf64	0	0	0
C9orf66	0	0	0
C9orf69	1	0	0
C9orf84	1	0	0
C9orf85	0	0	0
C9orf9	1	0	0
C9orf91	0	0	1
CA1	0	0	0
CA10	1	0	0
CA11	0	0	0
CA12	1	0	0
CA13	1	0	0
CA14	1	0	0
CA2	1	0	0
CA3	0	0	0
CA4	1	0	0
CA5A	0	0	0
CA6	0	0	0
CA7	1	0	0
CA8	1	0	0
CA9	0	0	0
CAB39	1	0	0
CAB39L	1	0	0
CABIN1	0	0	0
CABLES1	0	0	0
CABLES2	0	0	0
CABP1	1	0	0
CABP2	0	0	0
CABP4	0	0	0
CABP5	0	0	0
CABP7	1	0	0
CABS1	1	0	0
CABYR	0	0	0
CACHD1	0	0	1
CACNA1A	0	0	0
CACNA1B	0	1	0
CACNA1C	0	0	1
CACNA1D	1	0	0
CACNA1E	1	0	0
CACNA1H	1	1	0
CACNA1I	1	0	0
CACNA1S	1	0	0
CACNA2D1	0	0	1
CACNA2D2	0	1	0
CACNA2D4	0	0	0
CACNB1	0	0	0
CACNB2	1	0	0
CACNB3	0	0	0
CACNB4	1	0	0
CACNG1	0	0	0
CACNG2	1	0	0
CACNG3	0	0	0
CACNG4	0	0	0
CACNG5	0	0	0
CACNG6	1	0	0
CACNG7	1	0	0
CACNG8	0	0	0
CACYBP	0	0	0
CAD	0	0	0
CADM1	0	0	0
CADM2	1	0	0
CADM3	0	0	1
CADM4	1	1	0
CADPS	1	1	1
CADPS2	1	0	0
CAGE1	0	0	0
CALB1	1	0	0
CALB2	1	0	0
CALCA	1	0	0
CALCB	1	1	0
CALCOCO1	1	1	0
CALCOCO2	0	0	0
CALCR	1	0	0
CALCRL	0	0	0
CALD1	1	0	0
CALHM1	0	0	0
CALHM2	0	0	0
CALHM3	0	0	0
CALM1	0	0	0
CALM2	0	0	1
CALM3	0	0	0
CALML3	0	0	0
CALML4	0	0	0
CALML5	0	0	0
CALML6	0	0	0
CALN1	1	0	0
CALR	0	0	0
CALR3	0	0	0
CALU	0	0	0
CALY	1	0	0
CAMK1	0	0	0
CAMK1D	0	0	1
CAMK1G	1	0	0
CAMK2A	0	0	0
CAMK2B	1	0	1
CAMK2D	1	0	1
CAMK2G	0	1	0
CAMK2N1	1	0	0
CAMK2N2	0	0	0
CAMK4	0	0	1
CAMKK1	0	0	0
CAMKK2	0	0	0
CAMKMT	0	0	0
CAMKV	0	0	0
CAMLG	0	0	0
CAMP	0	0	0
CAMSAP1	0	0	0
CAMSAP2	0	0	0
CAMSAP3	0	0	0
CAMTA2	0	0	0
CAND1	1	0	0
CAND2	0	0	0
CANT1	0	0	0
CANX	0	0	0
CAP1	1	0	0
CAP2	0	0	0
CAPN1	0	0	0
CAPN10	0	0	0
CAPN11	0	0	0
CAPN12	0	0	0
CAPN13	1	0	0
CAPN14	1	0	0
CAPN2	1	0	0
CAPN3	0	0	0
CAPN5	0	0	0
CAPN7	1	0	0
CAPN8	1	0	0
CAPN9	0	0	0
CAPNS1	0	0	0
CAPRIN1	0	0	1
CAPRIN2	1	1	0
CAPS	0	0	0
CAPS2	1	0	0
CAPSL	0	0	0
CAPZA1	0	0	0
CAPZA2	1	0	1
CAPZA3	0	0	0
CAPZB	0	0	0
CARD10	0	0	0
CARD11	1	0	0
CARD14	0	0	0
CARD16	0	0	0
CARD17	0	0	0
CARD18	0	0	0
CARD6	1	0	0
CARD8	0	0	0
CARD9	0	0	0
CARKD	0	0	0
CARM1	0	0	0
CARNS1	1	0	0
CARS	0	0	0
CARS2	1	0	0
CARTPT	1	0	0
CASC1	1	0	0
CASC3	0	0	0
CASC4	0	0	0
CASC5	0	0	0
CASD1	1	0	0
CASKIN1	0	0	0
CASKIN2	0	0	0
CASP1	0	0	0
CASP10	0	0	0
CASP14	0	0	0
CASP2	0	0	0
CASP3	0	0	0
CASP4	0	0	0
CASP5	0	0	0
CASP6	1	0	0
CASP7	0	0	0
CASP8	1	0	0
CASP9	0	0	0
CASQ1	0	0	0
CASQ2	1	0	1
CASR	1	0	0
CASS4	0	0	0
CAST	1	0	0
CASZ1	0	0	1
CAT	0	0	0
CATSPER1	0	0	0
CATSPER2	0	0	0
CATSPER3	0	0	0
CATSPER4	0	0	0
CATSPERB	1	0	0
CATSPERD	0	0	0
CATSPERG	0	0	0
CAV1	1	0	0
CAV2	0	0	0
[truncated: 13,646 more rows]

## Sheet: IMR5-75_HyperDownHR
Gene symbol	K27me3 lost (118)	expression induced (114)	DNA methylation lost (48)
ABCB1	0	1	1
ABR	1	1	0
ACHE	1	0	0
ADCY1	0	0	0
ADRB2	1	0	0
AGT	0	0	0
AHNAK	0	1	0
ALCAM	0	1	0
ALS2CL	0	1	0
AMIGO2	0	1	0
ANKRD35	1	0	0
ANKS1A	0	1	0
ANO6	0	0	0
ANXA2	1	1	0
AQP1	0	1	1
ARHGDIB	0	0	0
ARHGEF10L	0	1	0
ARHGEF3	0	1	0
ASB2	1	0	0
ATP1B1	0	1	0
ATP2B4	1	1	0
B2M	0	0	0
BCAT1	0	0	0
BCL2	0	0	0
BOK	0	0	0
BST2	0	0	0
BTBD3	0	0	0
BZRAP1	1	0	0
C10orf10	0	1	0
C11orf21	1	0	0
c1orf173	0	0	0
C1R	1	0	0
CACNA1G	1	0	1
CACNA2D3	1	0	0
CAMTA1	0	0	1
CAPG	0	0	0
CCDC24	0	1	0
CCDC68	0	0	0
CCND1	0	0	0
CCR7	1	0	0
CD247	1	0	0
CD27	0	0	0
CD3D	1	0	0
CD44	0	1	0
CD52	0	0	0
CD74	0	0	0
CD9	1	1	0
CDC42	0	0	0
CDH22	1	0	0
CDKN2D	0	0	0
CELF4	1	0	0
CHD5	1	1	0
CHGB	0	1	0
CLDN5	0	0	0
CLEC3B	0	0	1
CNKSR3	1	1	0
CNR1	0	1	0
CNTN1	0	1	0
CNTNAP2	0	0	1
COG5	0	0	0
COL18A1	1	0	0
COL1A1	0	1	0
COL9A2	0	1	0
CORO1A	0	0	0
CPLX3	0	0	0
CPNE8	0	0	0
CREB5	1	0	1
CRIP2	0	1	0
CSGALNACT1	0	0	1
CTNNBIP1	0	0	0
CXXC5	1	1	0
CYB561	0	0	1
CYB5R2	1	0	0
DBH	0	1	0
DDC	1	1	0
DENND2D	1	0	0
DGKB	0	1	0
DKK3	1	1	0
DLC1	0	0	1
DLEU7	0	0	0
DLG2	0	0	1
DNAJA4	0	0	1
DNER	1	0	1
DOCK10	0	0	0
DOCK4	0	0	0
DPP6	1	0	1
DPYSL3	0	1	0
DUSP23	1	0	0
DUSP6	0	1	0
EBF1	0	0	1
ECHDC3	0	0	0
EFNB2	1	1	0
EGLN3	0	1	0
ENOSF1	0	0	0
ENOX1	0	0	1
ENTPD3	0	0	0
EPAS1	1	0	0
EPB41L1	1	1	0
EPB41L3	1	1	0
EPB41L4A	1	0	0
EPHA5	1	1	0
EPHB3	1	0	0
EPS8L1	1	0	0
EXOC4	0	0	1
FAM102B	0	0	0
FAM134B	0	1	0
FAM167A	1	1	0
FBLN5	1	0	0
FDCSP	0	0	0
FLRT3	0	0	0
FNDC5	0	1	0
FOXO1	0	1	0
FRZB	0	1	0
GATA3	0	0	0
GBP5	0	0	0
GDPD5	1	0	0
GEM	0	0	0
GFRA2	1	0	0
GFRA3	1	0	0
GIMAP8	0	0	0
GNG2	0	1	0
GPR123	1	0	1
GPR158	1	0	0
GPR22	0	0	0
GRID2	0	0	1
HAND1	0	0	0
HENMT1	0	0	1
HEYL	1	1	0
HIST1H1A	0	0	0
HLA-DOA	1	0	0
HLA-F	1	0	0
HOXB2	0	0	0
HOXC9	0	0	0
HS3ST5	0	0	0
HS6ST3	0	0	0
HSPA12A	1	0	0
HTR4	1	0	0
HYI	0	0	0
ICA1	0	1	1
ICAM2	0	0	0
IGSF21	1	0	0
IL2RB	1	0	0
IL4R	1	0	0
IL7	0	0	0
INPP5D	1	1	0
ITGB8	0	0	0
ITM2C	0	1	0
KCNH8	0	1	1
KCNK10	1	1	0
KCNMA1	1	0	0
KCTD16	0	1	0
KIAA0513	0	1	0
KIF1B	0	0	0
KIF26B	1	1	1
KLF11	0	0	0
KLHDC8A	1	1	0
KLHL6	0	0	0
KNDC1	1	0	0
KRT19	1	0	0
LAMA4	0	0	0
LCK	0	0	1
LCP1	0	0	0
LGALS2	1	0	0
LHFPL2	0	0	1
LIFR	0	0	0
LINGO1	1	1	0
LMO1	1	0	0
LRFN2	1	0	0
LRRC55	1	0	0
LRRN3	0	0	1
LRRTM4	0	0	0
LSP1	1	0	0
LTB	0	0	0
MAP7	1	0	0
MAPT	1	1	0
MATN2	0	1	0
MDGA1	1	1	1
ME1	0	0	0
MEIS1	0	0	1
MEIS2	0	0	1
MEST	1	1	0
MFI2	0	1	0
MGAT4C	0	0	0
MXRA7	0	1	0
MYLK	0	1	1
MYO15A	1	0	0
MYO16	0	0	0
MYO7A	0	0	0
NCKAP5	0	0	1
NEFH	0	1	0
NES	1	1	0
NGFR	1	1	0
NNAT	0	1	0
NPFF	0	0	0
NR4A1	1	0	0
NRCAM	0	1	0
NRP2	0	0	0
NTRK1	0	1	0
NXPH1	0	0	0
OSBPL3	0	1	0
PAG1	0	0	0
PAPLN	1	0	0
PARVA	0	1	0
PCDH7	1	1	0
PCDH9	0	1	1
PCDHB15	0	0	0
PCDHB5	0	0	0
PCDHB7	0	0	0
PCSK1	0	0	0
PGM2L1	0	1	0
PIK3CD	0	1	0
PIWIL2	0	0	0
PLAT	0	1	0
PLCD4	0	0	0
PLXNA4	1	0	1
PLXNC1	1	0	1
PMEL	0	1	0
PMP22	1	1	0
POMC	1	0	0
PPAPDC1A	0	1	0
PPP1R3B	0	0	0
PRDM2	1	0	0
PRKCB	1	0	0
PRKCZ	1	0	0
PRPH	1	1	0
PRPH2	0	0	0
PRRT2	0	0	0
PRUNE2	0	1	1
PTGDS	0	0	0
PTGER4	1	0	0
PTN	0	0	0
PTPRC	0	0	0
PTPRF	0	0	0
PVRL1	0	0	0
QPCT	0	0	0
RAB32	0	0	0
RAB3B	0	1	0
RAB3C	1	1	0
RAMP1	0	1	0
RAMP3	1	0	0
RAP1GAP2	1	0	0
RAPGEF4	1	1	0
RARRES2	0	0	0
RARRES3	1	0	0
RASD1	0	0	0
RBP1	0	0	0
RFTN1	0	1	0
RGMB	0	0	0
RGS10	1	0	0
RGS5	0	1	0
RGS7	0	0	1
RGS9	1	1	0
RHBDL3	1	1	0
RHOH	0	0	1
RHOU	0	0	1
RIMS3	0	0	0
ROBO3	1	0	0
RYR2	1	1	0
S1PR4	1	0	0
SAMD11	0	1	0
SCG2	0	1	0
SCML4	0	0	0
SCN9A	0	1	0
SCPEP1	0	1	0
SDK1	0	1	1
SEMA3E	0	1	1
SEMA3G	0	0	0
SEPP1	1	0	0
SERPINA5	1	0	0
SERPINE2	0	1	0
SEZ6	1	0	0
SEZ6L	1	0	0
SFRP1	0	1	0
SHC1	0	1	0
SIGIRR	1	0	0
SLAMF8	1	0	0
SLC18A1	1	0	0
SLC18A2	0	0	0
SLC26A11	0	1	0
SLC8A1	0	1	0
SLCO3A1	0	1	0
SNTG2	1	0	0
SOBP	0	1	1
SORBS2	0	0	1
SORL1	0	1	0
SPEG	1	1	0
SPOCK1	1	0	0
SPOCK2	0	0	0
SPTB	1	0	0
SRGAP1	0	1	1
SRGAP3	0	1	0
SRGN	1	0	0
ST6GALNAC5	0	0	0
STAB1	0	0	0
STAC	0	0	0
SV2B	1	1	0
SYBU	0	1	0
SYN3	1	1	0
SYT4	0	1	0
TAGLN2	1	1	0
TFAP2B	0	0	0
TG	0	0	0
TGFBR2	1	1	0
TH	1	0	0
TIAM2	0	0	0
TLN2	1	0	0
TMC8	1	0	0
TMEFF2	0	0	1
TMEM107	0	0	0
TMTC2	0	1	1
TNF	0	0	0
TOX2	1	0	0
TRIM2	0	0	0
TRIM36	0	0	0
TRPV2	0	0	0
TUBA1C	0	1	0
TXNIP	0	0	0
VAMP8	0	0	0
VAT1L	0	0	0
VCAM1	0	0	0
VSTM2A	0	0	0
VSTM2L	0	0	0
VWDE	0	0	1
WDFY4	0	0	0
WNT4	1	0	0
XKR4	1	0	0
ZAP70	0	0	0
ZFHX4	0	1	1
ZFP36L2	0	0	0
ZFPM2	0	0	1

## Sheet: IMR5-75_Global
Gene symbol	K27me3 lost (4604)	expression induced (2079)	DNA methylation lost (1394)
A1BG	0	0	0
A1CF	1	0	0
A2M	1	0	0
A2ML1	1	0	0
A4GALT	1	0	0
A4GNT	0	0	0
AAAS	1	0	0
AACS	0	1	0
AADAC	0	0	0
AADACL2	0	0	0
AADACL4	1	0	0
AADAT	0	0	0
AAGAB	1	0	0
AAK1	0	1	0
AAMP	0	0	0
AANAT	0	0	0
AARS	0	0	0
AARS2	1	0	0
AASDHPPT	0	0	0
AASS	1	0	0
AATF	0	0	0
AATK	0	0	1
ABAT	1	1	0
ABCA1	0	0	0
ABCA10	0	1	0
ABCA12	0	0	0
ABCA13	1	0	0
ABCA2	0	0	0
ABCA3	0	1	0
ABCA4	0	0	1
ABCA5	0	1	0
ABCA6	0	1	0
ABCA7	1	1	0
ABCA8	0	0	0
ABCA9	0	1	0
ABCB10	0	0	0
ABCB11	0	0	0
ABCB4	0	0	0
ABCB5	1	0	0
ABCB6	0	1	0
ABCB8	0	0	0
ABCB9	0	0	0
ABCC1	0	0	0
ABCC10	1	1	0
ABCC11	0	0	0
ABCC12	1	0	0
ABCC2	0	0	0
ABCC3	1	0	0
ABCC4	0	0	0
ABCC5	0	0	1
ABCC6	0	1	0
ABCC8	0	1	0
ABCC9	0	0	0
ABCD2	0	0	0
ABCD3	0	0	0
ABCD4	0	1	0
ABCE1	0	0	1
ABCF1	0	0	0
ABCF2	0	0	0
ABCF3	1	0	0
ABCG1	1	0	0
ABCG2	1	1	0
ABCG4	1	0	0
ABCG5	0	0	0
ABCG8	0	0	0
ABHD1	0	0	0
ABHD10	0	0	0
ABHD12	0	0	0
ABHD12B	0	0	0
ABHD13	0	0	0
ABHD14A	0	0	0
ABHD14B	0	1	0
ABHD15	1	0	0
ABHD16A	0	0	0
ABHD16B	0	0	1
ABHD2	1	0	0
ABHD3	0	0	0
ABHD4	1	1	0
ABHD5	0	0	0
ABHD6	0	0	0
ABHD8	0	0	0
ABI1	1	0	0
ABI2	0	0	0
ABI3	1	0	0
ABI3BP	0	0	1
ABL1	0	0	0
ABL2	0	0	0
ABLIM1	1	0	0
ABLIM2	1	0	1
ABLIM3	1	0	0
ABRA	0	0	0
ABT1	1	0	0
ABTB1	0	1	0
ABTB2	1	1	0
ACAA2	1	0	0
ACACA	0	0	0
ACACB	1	1	0
ACAD10	0	1	0
ACAD11	0	0	0
ACAD8	0	1	0
ACAD9	0	0	0
ACADL	0	0	0
ACADM	0	0	0
ACADS	0	0	0
ACADSB	0	0	0
ACADVL	0	1	0
ACAN	1	0	0
ACAP1	1	0	0
ACAP2	0	0	1
ACAP3	0	0	0
ACAT1	0	0	0
ACAT2	0	0	0
ACBD3	1	0	0
ACBD4	0	0	0
ACBD5	1	0	0
ACBD6	0	0	1
ACBD7	0	0	0
ACCS	0	0	0
ACCSL	0	0	0
ACD	0	0	0
ACE	1	1	0
ACER1	1	0	0
ACER2	0	1	0
ACER3	0	0	0
ACIN1	1	0	0
ACLY	0	0	0
ACMSD	0	0	0
ACO1	0	0	0
ACO2	0	0	0
ACOT1	0	0	0
ACOT11	0	1	0
ACOT12	0	0	1
ACOT13	0	0	0
ACOT2	0	0	0
ACOT4	0	0	0
ACOT6	0	0	0
ACOT7	1	0	0
ACOT8	0	0	0
ACOX1	0	1	0
ACOX2	0	0	0
ACOX3	0	0	0
ACOXL	0	0	1
ACP1	0	0	0
ACP2	0	1	0
ACP5	0	0	0
ACP6	1	1	0
ACPP	0	0	0
ACPT	1	0	0
ACR	0	0	0
ACRBP	0	0	0
ACRV1	1	0	0
ACSBG1	1	0	0
ACSBG2	1	0	0
ACSF2	0	1	0
ACSF3	0	0	0
ACSL1	0	0	0
ACSL3	0	0	0
ACSL5	1	0	0
ACSL6	1	1	0
ACSM1	1	0	0
ACSM2A	0	0	0
ACSM3	1	0	0
ACSM4	1	0	0
ACSM5	1	0	0
ACSS1	0	1	0
ACSS2	0	1	0
ACSS3	0	0	0
ACTA1	0	0	0
ACTA2	0	1	0
ACTB	0	0	0
ACTBL2	0	0	0
ACTC1	0	0	0
ACTG1	0	1	0
ACTG2	0	0	0
ACTL10	0	0	0
ACTL6A	0	0	0
ACTL6B	1	0	0
ACTL7A	0	0	0
ACTL7B	0	0	0
ACTL8	1	1	0
ACTL9	1	0	0
ACTN1	0	1	0
ACTN2	0	1	0
ACTN4	0	0	0
ACTR10	1	0	0
ACTR1A	0	0	0
ACTR1B	0	0	0
ACTR2	0	0	0
ACTR3	1	0	0
ACTR3B	0	0	0
ACTR3C	0	0	0
ACTR5	0	0	0
ACTR8	0	0	0
ACTRT2	1	0	0
ACVR1	0	1	0
ACVR1B	0	0	0
ACVR1C	0	1	0
ACVR2A	0	0	0
ACVR2B	0	0	0
ACVRL1	0	0	0
ACY1	0	0	0
ACY3	1	0	0
ACYP1	0	0	0
ACYP2	0	0	0
ADA	1	0	0
ADAD1	0	0	0
ADAD2	1	0	0
ADAL	0	0	0
ADAM10	0	0	0
ADAM11	1	1	0
ADAM12	0	0	0
ADAM15	0	1	0
ADAM17	0	0	1
ADAM18	0	0	0
ADAM19	0	1	1
ADAM2	0	0	0
ADAM20	0	0	0
ADAM21	0	0	0
ADAM22	0	1	0
ADAM23	0	0	0
ADAM28	0	0	0
ADAM29	1	0	0
ADAM30	1	0	0
ADAM32	0	0	0
ADAM33	1	0	0
ADAM7	0	0	0
ADAM8	1	1	0
ADAMDEC1	0	0	0
ADAMTS1	0	0	0
ADAMTS10	1	0	0
ADAMTS12	0	0	0
ADAMTS13	0	1	0
ADAMTS14	1	1	0
ADAMTS15	0	0	0
ADAMTS16	1	0	0
ADAMTS17	0	1	0
ADAMTS18	1	0	1
ADAMTS19	1	0	0
ADAMTS2	1	0	0
ADAMTS20	0	0	0
ADAMTS3	1	0	0
ADAMTS5	0	0	0
ADAMTS6	0	1	0
ADAMTS7	0	1	0
ADAMTS8	1	0	0
ADAMTS9	0	1	0
ADAMTSL1	0	1	0
ADAMTSL2	0	1	0
ADAMTSL3	0	1	0
ADAMTSL4	0	0	0
ADAMTSL5	1	0	0
ADAP1	1	0	0
ADAP2	0	0	0
ADAR	1	0	0
ADARB1	0	1	0
ADARB2	1	0	1
ADAT1	0	0	0
ADAT2	0	0	0
ADAT3	0	0	0
ADCK1	0	0	0
ADCK2	0	0	0
ADCK3	0	0	0
ADCK4	0	0	0
ADCK5	0	1	0
ADCY10	0	0	0
ADCY2	1	0	0
ADCY3	0	0	0
ADCY4	1	0	0
ADCY5	1	1	0
ADCY6	1	1	1
ADCY7	1	0	0
ADCY8	1	0	0
ADCY9	0	0	0
ADCYAP1	1	1	0
ADCYAP1R1	1	0	0
ADD1	0	0	0
ADD2	0	0	0
ADD3	0	0	0
ADGB	0	0	0
ADH1A	0	0	0
ADH1B	0	0	0
ADH4	0	0	0
ADH5	0	0	0
ADH6	0	0	0
ADH7	0	0	0
ADHFE1	1	0	0
ADI1	0	0	0
ADIG	0	0	0
ADIPOQ	0	0	0
ADIPOR2	0	0	0
ADK	0	0	0
ADM	1	0	0
ADM2	0	0	0
ADNP	0	0	1
ADNP2	0	0	0
ADO	1	0	0
ADORA1	1	0	0
ADORA2A	0	1	0
ADORA2B	0	0	0
ADORA3	0	0	0
ADPGK	0	0	0
ADPRH	0	0	0
ADPRHL1	1	0	0
ADPRHL2	0	0	0
ADRA1A	0	0	0
ADRA1B	0	0	0
ADRA1D	1	0	0
ADRA2A	0	0	0
ADRA2B	0	0	0
ADRA2C	1	0	0
ADRB1	0	0	0
ADRB3	1	0	1
ADRBK1	0	0	0
ADRBK2	0	0	0
ADRM1	0	0	0
ADSL	0	0	0
ADSS	0	0	0
ADSSL1	1	1	0
ADTRP	0	0	0
AEBP1	1	1	0
AEBP2	0	0	0
AEN	1	0	0
AES	0	0	1
AFAP1	1	1	0
AFAP1L1	1	0	0
AFAP1L2	1	1	0
AFF1	0	1	1
AFF3	0	0	1
AFF4	0	0	0
AFG3L2	0	0	0
AFM	0	0	0
AFMID	0	0	0
AFP	0	0	1
AFTPH	0	0	0
AGA	0	0	0
AGAP1	0	0	1
AGAP2	1	1	0
AGAP3	0	0	0
AGAP5	0	0	0
AGBL1	0	0	0
AGBL2	0	0	1
AGBL3	0	0	1
AGBL4	0	0	0
AGBL5	0	0	0
AGER	0	0	0
AGFG1	0	0	1
AGFG2	1	0	0
AGGF1	0	0	0
AGK	1	0	1
AGL	0	1	0
AGMAT	0	0	0
AGMO	1	0	0
AGPAT1	0	0	0
AGPAT2	0	0	0
AGPAT3	1	0	0
AGPAT4	0	0	0
AGPAT5	1	0	0
AGPS	0	0	0
AGR2	1	0	0
AGR3	1	0	1
AGRN	1	1	1
AGRP	0	0	0
AGTPBP1	0	0	0
AGTR1	0	1	0
AGTRAP	0	0	0
AGXT	0	0	0
AGXT2	0	0	0
AHCTF1	0	0	0
AHCY	0	0	0
AHCYL1	0	0	0
AHCYL2	0	1	0
AHDC1	0	1	1
AHI1	0	0	0
AHNAK2	1	1	0
AHR	1	1	0
AHRR	1	1	0
AHSA1	0	0	0
AHSA2	0	1	0
AHSG	0	0	0
AHSP	1	0	0
AICDA	1	0	0
AIDA	0	0	0
AIF1	0	0	0
AIF1L	1	0	0
AIFM2	0	0	0
AIFM3	0	0	0
AIG1	0	0	0
AIM1	1	1	0
AIM1L	1	0	0
AIM2	1	0	0
AIMP1	0	0	0
AIMP2	0	0	0
AIP	0	0	0
AIPL1	1	0	0
AIRE	0	0	0
AJAP1	1	0	0
AJUBA	0	0	0
AK1	0	0	1
AK2	0	0	0
AK3	0	0	0
AK4	1	0	0
AK5	0	1	0
AK7	0	1	0
AK8	0	0	0
AKAP1	0	0	0
AKAP10	1	0	0
AKAP11	0	0	0
AKAP12	0	0	0
AKAP13	0	1	1
AKAP2	0	0	0
AKAP3	1	0	0
AKAP5	0	0	0
AKAP6	0	0	1
AKAP7	0	0	0
AKAP8	0	0	0
AKAP8L	0	0	0
AKAP9	0	0	1
AKIP1	0	0	0
AKIRIN1	0	0	0
AKIRIN2	0	0	0
AKNA	0	1	0
AKR1A1	0	0	0
AKR1B1	0	0	0
AKR1B10	0	0	0
AKR1B15	1	0	0
AKR1C1	0	0	0
AKR1C2	0	0	0
AKR1C4	0	0	0
AKR1D1	0	0	0
AKR1E2	0	0	0
AKR7A2	0	0	0
AKR7A3	0	0	0
AKT1	0	0	0
AKT1S1	0	0	0
AKT2	0	0	0
AKT3	0	0	1
AKTIP	0	0	0
ALAD	0	0	0
ALAS1	0	0	0
ALB	0	0	0
ALDH16A1	0	0	0
ALDH18A1	0	0	0
ALDH1A1	0	0	0
ALDH1A2	0	0	0
ALDH1A3	0	1	0
ALDH1B1	1	0	0
ALDH1L1	0	0	0
ALDH1L2	0	0	0
ALDH2	0	0	0
ALDH3A1	0	0	0
ALDH3A2	0	0	0
ALDH3B1	0	0	0
ALDH3B2	1	0	0
ALDH4A1	0	0	0
ALDH5A1	0	1	0
ALDH6A1	1	0	0
ALDH7A1	0	0	0
ALDH8A1	1	0	0
ALDH9A1	1	0	0
ALDOA	0	0	0
ALDOB	0	0	0
ALDOC	0	0	0
ALG1	1	0	0
ALG10	1	0	0
ALG11	0	0	0
ALG12	0	0	0
ALG14	0	0	0
ALG1L	0	0	0
ALG5	0	0	0
ALG6	0	0	0
ALG8	0	0	0
ALG9	0	0	0
ALK	0	0	0
ALKBH1	0	0	0
ALKBH2	0	0	0
ALKBH3	1	0	0
ALKBH4	0	0	0
ALKBH5	0	0	0
ALKBH6	0	0	0
ALKBH7	0	0	0
ALKBH8	0	0	0
ALLC	0	0	0
ALMS1	1	0	0
ALOX12	1	0	0
ALOX12B	1	1	0
ALOX15	1	0	0
ALOX15B	0	0	0
ALOX5	1	0	0
ALOX5AP	0	0	0
ALOXE3	0	0	0
ALPI	0	0	0
ALPK1	0	0	0
ALPK2	0	1	0
ALPK3	0	0	0
ALPL	0	1	0
ALPP	0	0	0
ALPPL2	0	0	0
ALS2	0	0	1
ALS2CR11	0	0	0
ALS2CR12	0	0	0
ALX1	0	0	0
ALX3	0	0	0
ALX4	0	0	0
ALYREF	0	0	1
AMACR	0	0	0
AMBN	1	0	0
AMBP	0	0	0
AMBRA1	0	0	0
AMDHD1	0	1	0
AMDHD2	0	0	0
AMFR	0	1	1
AMH	0	0	0
AMHR2	0	0	0
AMIGO1	1	0	0
AMIGO3	0	0	0
AMMECR1L	0	0	0
AMN	0	0	0
AMOTL1	0	0	0
AMOTL2	0	0	0
AMPD1	1	0	0
AMPD2	0	1	0
AMPD3	1	0	0
AMPH	0	0	0
AMT	0	0	0
AMTN	1	0	0
AMY2A	0	0	0
AMY2B	0	0	0
AMZ1	1	0	0
AMZ2	1	0	0
ANAPC11	0	0	0
ANAPC13	0	0	0
ANAPC16	0	0	0
ANAPC2	0	0	0
ANAPC4	0	0	0
ANAPC5	0	0	0
ANAPC7	0	0	0
ANG	0	0	0
ANGEL1	0	0	0
ANGEL2	0	0	0
ANGPT1	0	0	1
ANGPT2	0	0	0
ANGPT4	1	0	0
ANGPTL1	1	0	0
ANGPTL2	0	0	0
ANGPTL3	0	0	0
ANGPTL4	1	0	0
ANGPTL5	0	0	1
ANGPTL6	1	0	0
ANK1	1	1	0
ANK2	0	0	1
ANK3	0	1	1
ANKAR	0	0	0
ANKDD1A	0	0	0
ANKFN1	0	0	0
ANKFY1	0	0	0
ANKH	0	1	0
ANKHD1	0	0	0
ANKHD1-EIF4EBP3	0	0	0
ANKIB1	0	0	1
ANKK1	0	0	0
ANKLE1	0	0	0
ANKLE2	0	0	0
ANKMY1	0	0	0
ANKMY2	0	1	0
ANKRA2	0	1	0
ANKRD1	0	0	0
ANKRD10	1	0	1
ANKRD11	0	0	1
ANKRD12	0	0	0
ANKRD13A	1	1	0
ANKRD13B	0	0	1
ANKRD13C	0	0	0
ANKRD13D	0	0	0
ANKRD16	0	0	0
ANKRD17	0	0	1
ANKRD18A	0	1	0
ANKRD18B	0	1	0
ANKRD2	0	0	0
ANKRD20A3	0	0	0
ANKRD22	0	0	0
ANKRD23	0	0	0
ANKRD24	1	0	0
ANKRD26	0	0	0
ANKRD27	0	0	0
ANKRD28	0	0	1
ANKRD29	1	0	0
ANKRD30A	0	0	0
ANKRD30B	1	0	0
ANKRD31	0	0	0
ANKRD33	1	0	0
ANKRD33B	1	1	1
ANKRD34A	1	0	0
ANKRD34B	1	0	0
ANKRD34C	0	0	0
ANKRD36	0	0	0
ANKRD37	0	0	0
ANKRD39	0	0	0
ANKRD40	0	0	0
ANKRD42	0	1	0
ANKRD44	1	1	0
ANKRD45	0	0	0
ANKRD46	0	0	0
ANKRD49	0	0	0
ANKRD50	0	0	0
ANKRD52	0	0	0
ANKRD53	0	0	0
ANKRD55	0	0	0
ANKRD6	0	1	0
ANKRD63	0	0	0
ANKRD65	0	1	0
ANKRD7	0	0	0
ANKRD9	0	0	1
ANKS1B	0	1	0
ANKS3	0	0	0
ANKS4B	1	0	0
ANKS6	0	0	0
ANKUB1	0	0	0
ANKZF1	0	1	0
ANLN	0	0	0
ANO1	1	0	0
ANO10	0	1	0
ANO3	0	0	0
ANO4	0	0	0
ANO5	0	0	0
ANO7	0	0	0
ANO8	0	0	0
ANO9	0	0	0
ANP32A	0	0	0
ANP32B	1	0	1
ANP32D	0	0	0
ANP32E	0	0	0
ANPEP	1	0	0
ANTXR1	0	0	0
ANTXR2	0	0	1
ANXA1	0	0	1
ANXA11	0	1	0
ANXA13	0	0	0
ANXA3	0	0	0
ANXA4	0	0	0
ANXA5	0	1	0
ANXA6	0	0	0
ANXA7	0	0	0
ANXA9	0	0	0
AOAH	0	0	0
AOC2	1	0	0
AOC3	1	0	0
AOX1	0	0	0
AP1AR	0	0	0
AP1B1	0	0	0
AP1G1	0	0	0
AP1G2	1	1	0
AP1M1	1	0	0
AP1M2	1	0	0
AP1S1	0	1	0
AP1S3	0	1	0
AP2A1	0	1	0
AP2A2	0	0	0
AP2B1	0	0	0
AP2M1	0	0	0
AP2S1	0	0	0
AP3B1	0	0	0
AP3B2	0	1	0
AP3D1	0	0	0
AP3M1	0	0	0
AP3M2	0	0	0
AP3S1	0	0	1
AP4E1	0	0	0
AP4S1	0	0	0
AP5B1	1	1	0
APAF1	1	0	1
APBA1	0	0	0
APBA2	0	0	1
APBA3	1	0	0
APBB1	1	1	0
APBB1IP	1	0	0
APBB2	0	0	1
APBB3	0	1	0
APC	0	0	0
APC2	1	1	0
APCDD1	0	1	0
APCDD1L	0	0	0
APCS	1	0	0
APEH	0	1	0
APH1A	0	0	0
APH1B	0	1	0
API5	0	0	0
APIP	0	0	0
APITD1	0	0	0
APITD1-CORT	0	0	0
APLF	0	1	0
APLNR	1	0	0
APLP1	0	1	0
APLP2	0	1	1
APOA1	0	0	0
APOA1BP	0	0	0
APOA2	0	0	0
APOA4	0	0	0
APOA5	0	0	0
APOB	1	0	0
APOBEC1	1	0	0
APOBEC2	0	0	1
APOBEC3A	1	0	0
APOBEC3B	1	0	0
APOBEC3C	1	0	0
APOBEC3F	0	0	0
APOBEC3G	0	0	0
APOBEC3H	0	0	0
APOBEC4	0	0	0
APOBR	0	0	0
APOC1	0	0	0
APOC3	0	0	0
APOC4	0	0	0
APOC4-APOC2	0	0	0
APOD	0	0	0
APOE	1	1	0
APOF	0	0	0
APOH	0	0	0
APOL1	0	0	0
APOL2	0	0	1
APOL3	1	0	0
APOL4	0	0	0
APOL5	0	0	0
APOL6	0	0	0
APOLD1	0	0	0
APOM	0	0	0
APOPT1	1	0	0
APP	0	0	1
APPBP2	0	0	0
APPL1	0	0	0
APPL2	0	0	0
APRT	0	0	0
APTX	0	0	0
AQP10	0	0	0
AQP11	0	0	1
AQP12A	0	0	0
AQP12B	1	0	0
AQP2	0	0	0
AQP3	0	1	0
AQP4	0	0	0
AQP5	1	0	0
AQP6	1	0	0
AQP7	1	0	0
AQP8	1	0	0
AQP9	1	0	0
AQR	0	0	0
ARAP1	1	0	0
ARAP2	1	1	0
ARAP3	1	1	0
ARC	1	1	0
ARCN1	0	0	0
AREG	1	0	0
ARF1	1	0	0
ARF3	0	0	0
ARF4	0	0	0
ARF5	0	1	0
ARF6	0	0	0
ARFGAP1	0	0	0
ARFGAP2	0	0	0
ARFGAP3	0	1	0
ARFGEF1	0	0	0
ARFGEF2	0	0	0
ARFIP1	0	0	0
ARG1	0	0	0
ARG2	0	0	0
ARGFX	0	0	0
ARGLU1	0	0	0
ARHGAP1	0	1	0
ARHGAP10	0	0	0
ARHGAP11A	0	0	0
ARHGAP11B	0	0	0
ARHGAP12	0	0	0
ARHGAP15	0	0	1
ARHGAP17	1	0	0
ARHGAP18	0	1	0
ARHGAP19	0	0	0
ARHGAP20	0	0	0
ARHGAP21	0	0	0
ARHGAP22	1	0	0
ARHGAP23	1	1	0
ARHGAP24	0	1	0
ARHGAP25	0	0	0
ARHGAP26	1	1	0
ARHGAP27	1	1	0
ARHGAP28	0	0	0
ARHGAP29	1	1	0
ARHGAP30	1	0	0
ARHGAP31	0	1	0
ARHGAP32	0	0	1
ARHGAP33	0	0	0
ARHGAP35	0	0	0
ARHGAP39	0	0	0
ARHGAP40	1	0	0
ARHGAP42	0	0	1
ARHGAP44	1	1	0
ARHGAP5	0	0	0
ARHGAP8	1	0	0
ARHGAP9	0	1	0
ARHGDIA	0	0	0
ARHGDIG	0	0	0
ARHGEF1	1	1	0
ARHGEF10	1	0	0
ARHGEF11	1	0	0
ARHGEF12	0	0	1
ARHGEF15	1	0	0
ARHGEF16	1	0	0
ARHGEF17	0	0	0
ARHGEF18	1	0	0
ARHGEF19	1	0	0
ARHGEF2	1	0	0
ARHGEF25	0	1	0
ARHGEF26	1	0	0
ARHGEF33	0	0	0
ARHGEF38	0	0	0
ARHGEF4	1	0	0
ARHGEF40	1	0	0
ARHGEF5	0	0	0
ARHGEF7	1	0	0
ARID1A	0	0	0
ARID1B	0	0	1
ARID2	0	0	0
ARID3A	0	0	1
ARID3B	0	1	0
ARID3C	1	0	0
ARID4A	0	0	0
ARID4B	0	0	1
ARID5A	1	0	0
ARID5B	0	1	0
ARIH1	1	0	0
ARIH2	0	0	0
ARL1	0	0	0
ARL10	0	0	0
ARL11	0	0	1
ARL13B	0	0	0
ARL14	0	0	0
ARL15	0	0	0
ARL16	0	0	0
ARL2	0	0	0
ARL2BP	0	0	0
ARL3	0	0	0
ARL4A	0	0	0
ARL4C	0	0	0
ARL4D	1	0	0
ARL5A	0	0	0
ARL5B	0	0	0
ARL5C	1	0	0
ARL6	0	0	0
ARL6IP1	0	0	0
ARL6IP4	0	0	0
ARL6IP5	0	1	0
ARL6IP6	0	0	0
ARL8A	0	1	0
ARL8B	0	0	0
ARL9	0	0	0
ARMC1	0	0	0
ARMC10	0	0	0
ARMC12	0	0	0
ARMC2	0	0	0
ARMC3	0	0	0
ARMC4	1	0	0
ARMC5	0	1	0
ARMC7	1	0	0
ARMC8	1	0	0
ARMC9	0	0	1
ARMS2	0	0	0
ARNT	0	1	0
ARNT2	0	0	0
ARNTL	1	1	0
ARNTL2	0	0	1
ARPC1A	1	0	0
ARPC1B	1	0	0
ARPC2	0	0	0
ARPC4	0	0	0
ARPC4-TTLL3	0	0	0
ARPC5	0	0	0
ARPP19	0	0	0
ARPP21	1	0	0
ARRB1	0	0	0
ARRB2	0	0	0
ARRDC1	0	1	0
ARRDC2	0	0	0
ARRDC3	0	1	0
ARRDC4	0	0	0
ARRDC5	0	0	0
ARSA	0	1	0
ARSB	0	0	0
ARSG	0	1	0
ARSI	0	0	0
ARSJ	0	1	0
ARSK	0	0	0
ART1	0	0	0
ART3	0	0	1
ART4	0	0	0
ART5	0	1	0
ARTN	1	0	0
ARV1	0	0	0
ARVCF	1	1	0
AS3MT	0	0	0
ASAH1	0	1	0
ASAH2	1	0	0
ASAH2B	0	0	0
ASAP1	0	0	1
ASAP2	0	0	0
ASAP3	0	0	0
ASB1	1	0	0
ASB10	1	0	0
ASB13	0	0	0
ASB14	1	0	0
ASB15	0	0	0
ASB16	0	0	0
ASB17	1	0	0
ASB18	0	0	0
ASB3	0	0	0
ASB4	1	0	0
ASB5	0	0	0
ASB6	0	0	0
ASB7	0	0	0
ASB8	0	0	0
ASCC1	0	0	0
ASCC2	0	0	0
ASCC3	0	0	1
ASCL1	0	0	0
ASCL2	1	0	0
ASCL3	0	0	0
ASCL4	1	0	0
ASF1A	0	0	0
ASF1B	0	0	0
ASGR1	1	0	1
ASGR2	1	0	0
ASH1L	0	0	0
ASH2L	0	0	0
ASIP	0	0	0
ASL	0	1	0
ASNA1	0	0	0
ASNS	1	0	0
ASNSD1	0	0	0
ASPA	1	0	0
ASPDH	1	0	0
ASPG	0	0	1
ASPH	1	0	1
ASPHD1	0	1	0
ASPHD2	1	0	0
ASPM	0	0	0
ASPN	0	0	1
ASPRV1	0	0	0
ASPSCR1	0	0	0
ASRGL1	0	0	1
ASS1	0	0	0
ASTE1	0	0	0
ASTL	0	0	0
ASTN1	1	0	0
ASTN2	0	1	1
ASUN	0	0	0
ASXL1	0	0	0
ASXL2	0	0	0
ASZ1	1	0	0
ATAD1	0	0	1
ATAD2	0	0	0
ATAD2B	0	0	0
ATAD3A	0	0	0
ATAD3B	0	0	0
ATAD3C	0	0	1
ATAD5	0	0	0
ATAT1	0	1	0
ATCAY	1	1	0
ATE1	0	0	0
ATF1	0	0	0
ATF2	0	0	1
ATF3	0	1	0
ATF4	0	0	0
ATF5	0	0	0
ATF6	0	0	0
ATF6B	0	0	0
ATF7	0	0	0
ATF7IP	0	0	1
ATF7IP2	1	0	0
ATG10	0	0	0
ATG12	0	0	0
ATG13	0	0	0
ATG14	0	0	1
ATG16L1	1	0	0
ATG16L2	0	1	0
ATG2A	0	1	0
ATG2B	0	0	0
ATG3	0	0	0
ATG4B	0	0	0
ATG4C	1	0	0
ATG4D	1	0	0
ATG5	0	0	0
ATG7	1	0	0
ATG9B	1	0	0
ATHL1	0	0	0
ATIC	0	0	0
ATL1	0	0	0
ATL2	0	0	0
ATL3	1	0	0
ATM	0	0	0
ATMIN	0	0	0
ATN1	0	0	0
ATOH7	0	1	0
ATOH8	0	0	0
ATOX1	0	0	0
ATP10A	0	0	0
ATP10B	0	0	1
ATP10D	0	1	0
ATP11A	0	0	1
ATP11B	0	0	0
ATP12A	0	0	0
ATP13A1	0	1	0
ATP13A2	0	0	0
ATP13A3	0	0	1
ATP13A4	0	0	0
ATP13A5	0	0	0
ATP1A1	0	0	0
ATP1A2	1	0	0
ATP1A3	0	1	0
ATP1A4	1	0	0
ATP1B2	1	0	0
ATP1B3	0	0	0
ATP2A1	0	0	0
ATP2A2	0	0	1
ATP2A3	1	1	0
ATP2B1	0	0	0
ATP2B2	1	1	0
ATP2C1	0	0	0
ATP2C2	1	0	0
ATP4A	1	0	0
ATP4B	0	0	0
ATP5A1	0	0	0
ATP5B	0	0	0
ATP5C1	0	0	1
ATP5D	0	0	0
ATP5E	0	0	1
ATP5F1	0	0	0
ATP5G1	1	0	0
ATP5G2	1	0	0
ATP5J	0	0	0
ATP5J2	0	0	0
ATP5J2-PTCD1	0	0	1
ATP5L2	0	0	0
ATP5O	0	0	0
ATP5S	0	0	0
ATP5SL	1	0	0
ATP6AP1L	0	0	0
ATP6V0A1	1	1	0
ATP6V0A2	0	0	0
ATP6V0A4	0	0	0
ATP6V0C	0	0	0
ATP6V0D1	0	1	0
ATP6V0D2	1	0	0
ATP6V0E1	0	0	0
ATP6V0E2	0	1	0
ATP6V1A	0	0	1
ATP6V1B1	0	0	0
ATP6V1B2	0	0	0
ATP6V1C1	1	0	0
ATP6V1C2	1	0	0
ATP6V1E2	0	0	0
ATP6V1F	1	0	0
ATP6V1G1	1	0	0
ATP6V1G2	0	0	0
ATP6V1G3	0	0	0
ATP6V1H	0	0	0
ATP7B	0	1	0
ATP8A1	0	0	1
ATP8A2	1	1	1
ATP8B1	1	1	0
ATP8B2	1	0	0
ATP8B3	1	0	0
ATP8B4	0	0	0
ATP9A	1	1	0
ATP9B	0	0	0
ATPAF1	0	0	0
ATPAF2	0	0	0
ATPIF1	0	0	0
ATR	0	0	0
ATRIP	0	0	0
ATRN	1	0	0
ATRNL1	0	1	0
ATXN1	0	0	1
ATXN10	0	0	0
ATXN1L	0	0	0
ATXN2	0	0	0
ATXN2L	0	0	0
ATXN7	0	0	1
ATXN7L1	0	0	1
ATXN7L2	0	0	0
ATXN7L3B	0	0	0
AUH	0	0	0
AURKA	0	0	0
AURKAIP1	0	0	0
AURKB	0	0	0
AURKC	0	0	0
AUTS2	0	0	1
AVEN	0	0	1
AVIL	0	0	0
AVL9	0	0	0
AVP	0	0	0
AVPI1	0	0	0
AVPR1A	1	0	0
AVPR1B	1	0	1
AXDND1	1	0	0
AXIN1	0	0	1
AXIN2	0	0	0
AXL	1	0	0
AZGP1	0	0	0
AZI2	0	0	0
AZIN1	0	0	0
AZU1	0	0	0
B3GALNT1	0	0	1
B3GALNT2	0	0	0
B3GALT1	0	0	0
B3GALT2	0	0	0
B3GALT4	0	0	0
B3GALT6	0	0	1
B3GAT1	1	0	0
B3GAT2	0	1	0
B3GAT3	0	1	0
B3GNT2	0	0	0
B3GNT3	1	0	0
B3GNT4	1	0	0
B3GNT5	1	0	0
B3GNT6	1	0	0
B3GNT7	0	0	0
B3GNT8	0	0	0
B3GNT9	1	1	0
B3GNTL1	0	0	1
B4GALNT1	0	0	0
B4GALNT2	1	0	0
B4GALNT3	1	1	0
B4GALNT4	0	0	0
B4GALT1	0	1	0
B4GALT2	0	0	0
B4GALT3	0	0	0
B4GALT4	0	0	0
B4GALT5	1	0	0
B4GALT6	0	1	0
B4GALT7	1	0	0
B9D1	0	0	0
B9D2	0	0	0
BAALC	0	1	0
BAAT	0	0	0
BABAM1	0	0	0
BACE1	0	0	0
BACE2	1	0	0
BACH1	0	0	0
BACH2	1	1	1
BAG2	0	0	0
BAG3	0	0	0
BAG5	0	0	0
BAG6	0	0	0
BAHD1	0	0	0
BAIAP2	0	0	1
BAIAP2L1	1	0	0
BAIAP2L2	0	0	0
BAIAP3	1	1	0
BAK1	0	0	0
BAMBI	0	1	0
BANF1	1	0	0
BANF2	0	0	0
BANK1	0	0	0
BANP	0	0	1
BAP1	0	0	0
BARD1	0	0	0
BARHL1	1	0	0
BARHL2	1	0	0
BARX1	1	0	0
BARX2	1	0	0
BASP1	0	0	0
BATF	1	0	0
BATF2	0	0	0
BATF3	1	0	0
BAX	0	1	1
BAZ1A	0	0	0
BAZ1B	0	0	0
BAZ2A	0	1	0
BAZ2B	0	1	0
BBC3	1	1	0
BBIP1	0	0	1
BBOX1	0	0	0
BBS1	0	1	0
BBS10	0	0	0
BBS12	0	1	0
BBS2	1	1	0
BBS5	0	0	1
BBS7	0	0	0
BBS9	0	1	0
BBX	0	0	1
BCAM	1	0	0
BCAN	1	1	1
BCAP29	0	0	0
BCAR1	0	1	0
BCAR3	0	1	1
BCAS1	1	0	0
BCAS2	1	0	0
BCAS3	0	1	1
BCAS4	1	0	0
BCAT2	0	0	0
BCCIP	0	0	0
BCDIN3D	1	0	0
BCHE	0	0	0
BCKDHA	0	0	0
BCKDHB	0	0	0
BCKDK	0	0	0
BCL10	1	0	0
BCL11A	0	0	0
BCL11B	0	0	1
BCL2A1	0	0	0
BCL2L1	0	0	0
BCL2L10	1	0	0
BCL2L11	1	0	1
BCL2L12	0	0	0
BCL2L13	0	0	0
BCL2L14	0	0	1
BCL2L15	0	0	0
BCL2L2-PABPN1	0	0	0
BCL3	1	0	0
BCL6	0	1	1
BCL6B	1	0	0
BCL7A	0	0	0
BCL7B	0	0	0
BCL7C	0	0	0
BCL9	1	0	0
BCL9L	0	0	0
BCLAF1	1	0	0
BCO2	0	0	0
BCR	1	0	0
BCS1L	0	0	0
BDH1	0	0	0
BDH2	0	0	0
BDKRB1	0	0	0
BDKRB2	0	0	0
BDNF	0	0	0
BDP1	0	0	0
BEAN1	1	0	0
BECN1	0	1	0
BEGAIN	1	0	0
BEND3	0	0	0
BEND4	0	0	0
BEND5	0	0	0
BEND6	0	0	0
BEND7	1	0	1
BEST1	0	0	0
BEST2	1	0	0
BEST3	0	0	0
BEST4	0	0	0
BET1	1	0	0
BFAR	0	0	0
BFSP1	0	0	1
BFSP2	0	0	0
BGLAP	0	0	1
BHLHA15	0	0	0
BHLHA9	1	0	0
BHLHE22	1	0	0
BHLHE23	1	0	0
BHLHE40	1	0	0
BHLHE41	1	0	0
BHMT	0	0	0
BHMT2	0	0	0
BICC1	0	0	0
BICD1	0	0	0
BICD2	0	0	0
BID	0	0	0
BIK	1	1	0
BIN1	0	1	0
BIN2	0	0	0
BIN3	0	0	0
BIRC2	0	0	0
BIRC3	0	0	1
BIRC5	0	0	0
BIRC6	0	0	0
BIRC7	1	0	0
BIRC8	0	0	0
BIVM	0	0	0
BIVM-ERCC5	0	0	1
BLCAP	1	1	0
BLID	0	0	0
BLK	1	0	0
BLM	0	0	0
BLMH	0	0	0
BLNK	0	0	0
BLOC1S1	1	0	0
BLOC1S3	0	0	0
BLVRA	0	0	0
BLVRB	0	1	0
BLZF1	0	1	0
BMF	0	1	1
BMI1	1	0	0
BMP1	0	1	0
BMP10	0	0	0
BMP2	0	0	0
BMP2K	0	0	0
BMP3	0	0	0
BMP4	1	1	0
BMP5	0	0	0
BMP6	1	0	0
BMP7	1	0	0
BMP8A	1	1	0
BMP8B	0	0	0
BMPER	0	0	0
BMPR1A	0	0	1
BMPR1B	0	1	1
BMPR2	0	1	0
BMS1	1	0	0
BNC1	1	1	0
BNC2	0	0	0
BNIP1	1	0	0
BNIP2	1	0	0
BNIP3	1	0	0
BNIP3L	0	0	0
BNIPL	0	0	0
BOC	0	0	1
BOD1	1	0	0
BOLA1	0	1	0
BOLA3	0	0	0
BOLL	0	0	0
BOP1	0	0	0
BORA	0	0	0
BPGM	1	0	0
BPI	0	0	0
BPIFA1	1	0	0
BPIFA2	1	0	0
BPIFA3	1	0	0
BPIFB1	1	0	0
BPIFB2	1	0	0
BPIFB3	1	0	0
BPIFB4	1	0	0
BPIFB6	1	0	0
BPIFC	0	0	0
BPNT1	0	0	0
BPTF	1	0	0
BRAF	0	0	1
BRAP	0	0	0
BRAT1	0	0	0
BRCA1	0	0	0
BRCA2	0	0	1
BRD2	0	0	0
BRD3	1	0	0
BRD4	0	0	0
BRD7	0	0	0
BRD8	0	0	0
BRD9	0	0	0
BRDT	0	0	0
BRE	0	0	0
BRF1	1	0	0
BRF2	0	0	0
BRI3	1	1	0
BRI3BP	0	0	0
BRIP1	0	0	0
BRIX1	0	0	0
BRK1	0	0	0
BRMS1	0	0	0
BRMS1L	1	0	1
BROX	0	0	0
BRPF1	1	0	0
BRPF3	0	0	0
BRSK1	0	0	0
BRSK2	1	0	0
BRWD1	0	0	0
BSCL2	0	0	0
BSDC1	0	1	0
BSG	0	0	0
BSN	0	0	0
BSND	1	0	0
BSPH1	1	0	0
BSPRY	1	0	0
BST1	0	0	0
BSX	0	0	0
BTAF1	0	0	0
BTBD1	0	0	0
BTBD10	0	1	1
BTBD11	1	0	0
BTBD16	0	0	0
BTBD17	1	0	0
BTBD18	0	1	0
BTBD19	0	0	0
BTBD2	0	0	0
BTBD7	0	0	1
BTBD8	0	1	0
BTBD9	0	1	1
BTC	1	0	0
BTD	0	0	0
BTF3	0	0	1
BTF3L4	0	0	0
BTG2	0	1	0
BTG3	0	0	0
BTG4	0	0	0
BTLA	0	0	0
BTN1A1	0	0	0
BTN2A1	0	0	0
BTN2A2	0	0	1
BTN3A1	0	0	0
BTN3A2	1	0	0
BTN3A3	0	0	0
BTNL3	1	0	0
BTNL8	1	0	0
BTNL9	1	0	0
BTRC	1	0	0
BUB1	0	0	0
BUB1B	0	0	0
BUB3	0	0	0
BUD13	1	0	0
BUD31	0	0	0
BVES	0	1	0
BYSL	0	0	0
BZW1	0	0	0
C10orf105	1	0	0
C10orf107	0	0	0
C10orf11	0	0	0
C10orf113	0	0	0
C10orf12	1	0	0
C10orf120	0	0	0
C10orf128	0	0	0
C10orf131	0	0	0
C10orf2	0	0	0
C10orf35	1	0	0
C10orf53	0	0	0
C10orf54	1	0	0
C10orf55	0	0	0
C10orf62	0	0	0
C10orf67	1	0	0
C10orf71	1	0	0
C10orf76	0	0	0
C10orf82	0	0	0
C10orf88	0	0	0
C10orf90	0	0	0
C10orf99	0	0	0
C11orf1	0	0	0
C11orf16	0	0	0
C11orf24	0	0	0
C11orf31	0	0	0
C11orf40	1	0	0
C11orf42	1	0	0
C11orf45	0	0	0
C11orf49	0	0	0
C11orf52	0	0	0
C11orf53	0	0	0
C11orf54	0	0	0
C11orf57	0	0	0
C11orf58	1	0	0
C11orf63	0	0	0
C11orf65	0	0	0
C11orf68	0	1	0
C11orf70	0	0	0
C11orf71	0	0	1
C11orf74	0	0	0
C11orf80	0	0	0
C11orf84	0	0	0
C11orf85	0	0	0
C11orf86	0	0	0
C11orf87	0	0	0
C11orf88	0	0	0
C11orf91	0	0	0
C11orf94	0	0	0
C12orf10	0	0	0
C12orf29	0	0	0
C12orf4	0	0	0
C12orf40	0	0	0
C12orf42	0	0	0
C12orf43	1	0	0
C12orf45	0	0	0
C12orf49	1	0	0
C12orf50	0	0	0
C12orf54	0	0	0
C12orf56	0	0	0
C12orf57	0	0	0
C12orf60	0	0	0
C12orf65	0	0	0
C12orf66	0	0	0
C12orf73	0	0	0
C12orf74	0	0	0
C12orf75	0	0	0
C12orf76	0	0	0
C14orf1	0	0	0
C14orf105	1	0	0
C14orf142	0	0	0
C14orf159	0	0	0
C14orf166	0	0	0
C14orf177	0	0	0
C14orf178	0	0	0
C14orf180	0	0	0
C14orf2	0	0	0
C14orf28	1	0	1
C14orf37	0	1	1
C14orf39	1	0	0
C14orf79	0	1	0
C14orf80	0	0	0
C14orf93	0	0	0
C15orf38-AP3S2	0	0	0
C15orf39	1	0	0
C15orf40	0	0	0
C15orf41	0	0	1
C15orf43	0	0	0
C15orf48	0	0	0
C15orf52	0	0	0
C15orf53	0	0	0
C15orf57	0	0	0
C15orf59	0	1	0
C15orf61	0	0	0
C15orf62	0	0	0
C16orf13	0	0	0
C16orf45	0	0	0
C16orf46	0	0	0
C16orf52	0	0	1
C16orf54	0	0	0
C16orf58	0	0	0
C16orf59	0	0	0
C16orf62	0	0	0
C16orf70	0	0	0
C16orf71	0	0	0
C16orf72	1	0	0
C16orf74	1	0	0
C16orf78	1	0	0
C16orf87	0	0	0
C16orf89	1	0	0
C16orf90	0	0	0
C16orf92	0	0	0
C16orf95	1	0	0
C16orf96	0	0	0
C17orf100	1	0	0
C17orf105	0	0	0
C17orf107	0	0	0
C17orf47	1	0	0
C17orf49	0	0	0
C17orf50	1	0	0
C17orf51	1	0	0
C17orf53	0	0	0
C17orf58	1	1	0
C17orf62	0	0	0
C17orf64	0	0	0
C17orf67	0	0	0
C17orf74	0	0	0
C17orf75	0	0	1
C17orf78	0	0	0
C17orf80	0	0	0
C17orf89	0	0	0
C17orf96	1	0	0
C17orf97	0	0	0
C17orf98	0	0	0
C17orf99	0	0	0
C18orf21	0	0	0
C18orf25	0	0	0
C18orf32	0	0	0
C18orf42	1	0	0
C18orf54	0	0	0
C18orf63	0	0	0
C18orf8	0	0	0
C19orf12	1	0	0
C19orf18	0	0	0
C19orf24	0	0	0
C19orf25	1	0	0
C19orf33	0	0	0
C19orf35	1	0	0
C19orf38	0	0	0
C19orf44	0	0	0
C19orf45	1	0	0
C19orf47	0	0	0
C19orf48	1	0	0
C19orf53	0	0	0
C19orf54	0	0	0
C19orf57	0	0	0
C19orf60	0	0	0
C19orf66	1	0	0
C19orf70	0	0	0
C19orf71	0	0	0
C19orf73	0	0	0
C19orf81	1	0	0
C1D	0	1	0
C1GALT1	0	0	0
C1orf100	0	0	0
C1orf101	0	0	0
C1orf105	0	0	0
C1orf106	0	1	0
C1orf109	1	0	0
C1orf111	1	0	0
C1orf112	1	0	0
C1orf115	1	1	0
C1orf116	1	0	0
C1orf122	0	1	0
C1orf123	0	0	0
C1orf127	0	0	0
C1orf131	0	0	0
C1orf146	0	0	0
C1orf158	1	0	0
C1orf159	1	0	0
C1orf162	1	0	0
C1orf168	0	0	0
C1orf174	1	0	0
C1orf185	1	0	0
C1orf186	1	0	0
C1orf194	1	0	0
C1orf198	0	0	0
C1orf204	1	0	0
C1orf21	0	0	1
C1orf210	0	0	0
C1orf216	0	0	0
C1orf226	1	1	0
C1orf228	0	1	0
C1orf233	1	0	0
C1orf35	0	0	0
C1orf43	0	0	0
C1orf50	0	1	0
C1orf52	0	0	0
C1orf53	0	0	1
C1orf54	0	1	0
C1orf56	0	0	0
C1orf61	0	0	0
C1orf64	1	0	0
C1orf68	1	0	0
C1orf74	1	0	0
C1orf87	0	0	0
C1orf94	0	0	0
C1orf95	1	1	0
C1QA	1	0	0
C1QB	1	0	0
C1QC	1	0	0
C1QL1	0	0	0
C1QL2	1	0	0
C1QL3	0	0	0
C1QL4	1	1	0
C1QTNF1	1	0	0
C1QTNF2	0	0	0
C1QTNF3	0	0	0
C1QTNF4	1	1	0
C1QTNF5	0	0	0
C1QTNF6	0	0	0
C1QTNF7	0	0	1
C1QTNF8	1	0	0
C1QTNF9	0	0	1
C1QTNF9B	0	0	0
C1RL	1	0	0
C1S	0	0	0
C2	0	0	1
C20orf141	0	0	1
C20orf144	0	0	0
C20orf173	0	0	0
C20orf194	0	1	0
C20orf195	0	0	0
C20orf196	0	0	0
C20orf202	1	0	0
C20orf24	0	0	0
C20orf27	0	0	0
C20orf85	1	0	0
C20orf96	0	0	0
C21orf2	0	0	0
C21orf33	0	0	0
C21orf58	0	0	0
C21orf59	0	0	0
C21orf62	1	0	0
C21orf91	0	0	0
C22orf15	0	0	0
C22orf23	0	0	0
C22orf29	0	0	0
C22orf31	0	0	0
C22orf39	0	0	0
C22orf42	1	0	0
C22orf46	0	0	0
C2CD2	0	0	1
C2CD2L	0	1	0
C2CD3	0	0	0
C2CD4A	1	0	0
C2CD4B	1	0	0
C2CD4C	1	0	0
C2CD4D	1	0	0
C2orf15	1	0	0
C2orf16	0	0	0
C2orf40	0	0	0
C2orf42	0	0	0
C2orf44	1	0	0
C2orf47	0	0	0
C2orf49	0	0	0
C2orf50	1	0	0
C2orf54	1	0	1
C2orf61	0	0	0
C2orf66	0	0	0
C2orf68	0	0	0
C2orf69	0	0	0
C2orf70	1	0	0
C2orf71	0	0	0
C2orf72	1	0	0
C2orf73	0	0	0
C2orf74	1	0	0
C2orf76	0	0	0
C2orf78	0	0	0
C2orf80	0	0	0
C2orf81	0	0	0
C2orf82	1	0	0
C2orf83	0	0	1
C2orf88	0	1	0
C2orf91	0	0	0
C3	1	0	0
C3AR1	1	0	0
C3orf14	0	0	0
C3orf17	0	0	0
C3orf18	0	0	0
C3orf20	0	0	0
C3orf22	0	0	0
C3orf30	0	0	0
C3orf33	0	0	0
C3orf36	1	0	0
C3orf38	0	0	0
C3orf52	0	0	0
C3orf58	0	0	1
C3orf62	0	0	0
C3orf67	0	0	0
C3orf70	0	1	1
C3orf80	0	0	0
C4A	0	0	0
C4B	0	0	0
C4BPA	1	0	0
C4BPB	1	0	0
C4orf17	0	0	0
C4orf19	0	0	0
C4orf22	0	0	1
C4orf26	0	0	0
C4orf27	0	0	0
C4orf3	0	0	0
C4orf32	1	1	1
C4orf33	0	0	0
C4orf36	0	0	0
C4orf45	0	0	0
C4orf46	0	0	0
C4orf47	0	0	1
C4orf48	0	0	0
C4orf51	0	0	0
C5	0	0	0
C5AR1	1	0	0
C5orf15	0	0	1
C5orf22	0	0	0
C5orf24	0	0	0
C5orf28	0	0	0
C5orf30	0	0	1
C5orf34	0	0	1
C5orf38	1	0	0
C5orf42	0	0	1
C5orf45	0	0	0
C5orf46	1	0	0
C5orf47	0	0	0
C5orf49	0	0	0
C5orf51	1	0	0
C5orf52	0	0	0
C5orf63	0	0	1
C6	0	0	0
C6orf1	0	0	0
C6orf10	1	0	0
C6orf106	0	0	0
C6orf118	1	0	0
C6orf120	0	0	0
C6orf132	0	0	0
C6orf136	0	0	0
C6orf141	0	0	0
C6orf15	1	0	0
C6orf163	0	0	0
C6orf201	0	0	1
C6orf203	0	0	0
C6orf222	1	0	0
C6orf223	0	0	0
C6orf226	0	0	0
C6orf25	0	0	0
C6orf47	0	0	0
C6orf48	0	0	0
C6orf52	0	0	0
C6orf58	0	0	0
C6orf62	0	0	0
C6orf89	0	1	0
C7	0	0	0
C7orf25	0	0	0
C7orf26	0	0	0
C7orf31	0	0	0
C7orf33	0	0	1
C7orf34	0	0	0
C7orf43	1	0	0
C7orf49	0	0	0
C7orf50	0	0	1
C7orf57	1	0	0
C7orf60	0	0	0
C7orf61	0	0	0
C7orf62	1	0	0
C7orf72	1	0	0
C7orf73	0	0	0
C8A	0	0	0
C8B	1	0	0
C8orf22	0	0	0
C8orf33	1	0	0
C8orf34	0	0	0
C8orf37	1	0	0
C8orf4	0	0	0
C8orf44-SGK3	0	0	0
C8orf46	1	0	1
C8orf48	0	0	0
C8orf58	1	0	0
C8orf59	0	0	0
C8orf74	0	0	0
C8orf76	0	0	0
C8orf82	0	0	0
C8orf86	0	0	0
C9	1	0	0
C9orf116	0	0	0
C9orf129	0	0	0
C9orf131	0	0	0
C9orf135	0	1	0
C9orf142	0	0	0
C9orf152	0	0	0
C9orf16	0	0	0
C9orf172	0	0	0
C9orf173	0	0	0
C9orf24	0	0	0
C9orf3	0	1	0
C9orf40	0	0	0
C9orf43	0	0	0
C9orf47	0	0	0
C9orf50	0	0	0
C9orf57	0	0	0
C9orf64	0	0	0
C9orf66	1	0	0
C9orf69	1	0	0
C9orf84	0	0	0
C9orf85	0	0	0
C9orf9	1	0	0
C9orf91	0	0	0
CA1	1	0	0
CA10	1	0	0
CA11	0	0	0
CA12	0	1	0
CA13	0	0	0
CA14	0	0	0
CA2	1	0	0
CA3	1	0	0
CA4	1	0	0
CA5A	0	0	0
CA6	0	0	0
CA7	0	0	0
CA8	0	0	0
CA9	0	0	0
CAB39	0	0	0
CAB39L	0	0	1
CABIN1	0	1	1
CABLES1	0	0	0
CABLES2	0	0	0
CABP1	1	0	0
CABP2	1	0	0
CABP4	0	0	0
CABP5	1	0	0
CABP7	1	1	0
CABS1	1	0	0
CABYR	0	0	0
CACHD1	0	0	0
CACNA1A	1	0	0
CACNA1B	0	0	0
CACNA1C	0	0	0
CACNA1D	1	0	0
CACNA1E	1	0	0
CACNA1H	0	0	0
CACNA1I	1	0	0
CACNA1S	0	0	0
CACNA2D1	0	1	1
CACNA2D2	1	1	0
CACNA2D4	0	0	0
CACNB1	0	0	0
CACNB2	0	1	0
CACNB3	0	0	0
CACNB4	1	1	0
CACNG1	0	0	0
CACNG2	1	0	0
CACNG3	1	0	0
CACNG4	1	0	0
CACNG5	1	0	0
CACNG6	1	0	0
CACNG7	1	0	0
CACNG8	1	0	0
CACYBP	0	0	0
CAD	0	0	0
CADM1	0	1	1
CADM2	0	0	0
CADM3	1	0	0
CADM4	1	1	0
CADPS	0	1	0
CADPS2	1	0	0
CAGE1	1	0	1
CALB1	0	1	0
CALB2	1	0	0
CALCA	1	0	0
CALCB	0	0	0
CALCOCO1	1	1	0
CALCOCO2	0	1	0
CALCR	1	0	0
CALCRL	0	0	0
CALD1	0	0	1
CALHM1	0	0	0
CALHM2	0	0	0
CALHM3	0	0	0
CALM1	0	0	0
CALM2	0	0	0
CALM3	0	0	0
CALML3	0	0	0
CALML4	0	0	0
CALML5	0	0	0
CALML6	0	0	0
CALN1	1	0	0
CALR	0	0	0
CALR3	0	0	0
CALU	0	0	0
CALY	1	1	0
CAMK1	1	0	0
CAMK1D	0	0	0
CAMK1G	1	0	0
CAMK2A	0	0	0
CAMK2B	1	1	1
CAMK2D	0	0	1
CAMK2G	0	0	0
CAMK2N1	1	0	0
CAMK2N2	1	1	0
CAMK4	0	1	0
CAMKK1	0	1	0
CAMKK2	0	0	0
CAMKMT	0	0	0
CAMKV	0	1	0
CAMLG	0	0	0
CAMP	0	0	0
CAMSAP1	0	0	1
CAMSAP2	0	0	0
CAMSAP3	1	0	0
CAMTA2	0	0	0
CAND1	0	0	1
CAND2	1	1	0
CANT1	0	0	0
CANX	0	0	0
CAP1	0	0	0
CAP2	0	0	0
CAPN1	0	1	0
CAPN10	0	0	0
CAPN11	1	0	0
CAPN12	1	0	0
CAPN13	0	0	0
CAPN14	1	0	0
CAPN2	0	0	0
CAPN3	0	0	0
CAPN5	1	1	0
CAPN7	0	0	0
CAPN8	0	0	0
CAPN9	0	0	0
CAPNS1	1	0	0
CAPRIN1	1	0	0
CAPRIN2	1	1	0
CAPS	0	1	0
CAPS2	0	0	0
CAPSL	0	0	0
CAPZA1	0	0	0
CAPZA2	1	0	1
CAPZA3	0	0	0
CAPZB	1	0	0
CARD10	1	1	0
CARD11	0	0	0
CARD14	0	1	0
CARD16	0	0	0
CARD17	0	0	0
CARD18	0	0	0
CARD6	0	0	0
CARD8	0	0	0
CARD9	0	0	0
CARKD	0	0	0
CARM1	0	0	0
CARNS1	1	0	0
CARS	1	0	0
CARS2	0	0	0
CARTPT	0	0	0
CASC1	0	0	0
CASC3	0	0	0
CASC4	0	0	0
CASC5	0	0	0
CASD1	1	0	0
CASKIN1	1	0	0
CASKIN2	0	0	0
CASP1	0	0	0
CASP10	0	0	0
CASP14	1	0	0
CASP2	0	0	0
CASP3	0	0	0
CASP4	0	0	0
CASP5	0	0	1
CASP6	0	1	0
CASP7	0	0	0
CASP8	0	1	0
CASP9	0	1	0
CASQ1	1	0	0
CASQ2	0	0	0
CASR	1	0	0
CASS4	1	0	0
CAST	1	1	0
CASZ1	1	1	1
CAT	0	0	0
CATSPER1	1	0	0
CATSPER2	0	0	0
CATSPER3	0	0	0
CATSPER4	1	0	0
CATSPERB	1	0	0
CATSPERD	1	0	0
CATSPERG	0	1	0
CAV1	1	0	0
CAV2	1	0	0
[truncated: 13,646 more rows]
